# Supplementary material
Source: PubMed Central journal article supplement (PMC8112392)
Supplement: NIHMS1663335-supplement-Supplementary_Material.pdf [file NIHMS1663335-supplement-Supplementary_Material.pdf]

## Supplementary Materials for

### The *Campylobacter jejuni* chemoreceptor Tlp10 has a bimodal ligand-binding domain and specificity for multiple classes of chemoeffectors

Bassam A. Elgamoudi, Ekaterina P. Andrianova, Lucy K. Shewell, Christopher J. Day, Rebecca M. King, Taha, Hossinur Rahman, Lauren E. Hartley-Tassell, Igor B. Zhulin, Victoria Korolik\*

\*Corresponding author. Email: v.korolik@griffith.edu.au

Published 5 January 2021, *Sci. Signal.* **14**, eabc8521 (2021)  
DOI: 10.1126/scisignal.abc8521

#### The PDF file includes:

Fig. S1. Representative sensorgrams from SPR analysis of the interaction of Tlp10<sup>LBD</sup> with various ligands.

Fig. S2. Mutant Tlp10<sup>LBD</sup> proteins are correctly folded.

Fig. S3. Invasion of mammalian cells by WT and mutant *C. jejuni* in the presence and absence of fucose and galactose.

Table S1. HHpred search results for small subset of DAHL domains from various species.

Table S2. Molecules included in the glycan microarray.

Table S3. Molecules included in the small-molecule microarray.

Table S4. Complex glycan structures recognized by Tlp10.

Table S5. Chemotaxis responses of WT and mutant *C. jejuni* strains.

Table S6. Illustration of A-B-A competition SPR analysis of WT Tlp10<sup>LBD</sup>.

Table S7. Illustration of A-B-A competition SPR analysis of Tlp10<sup>LBD</sup>Y70A.

Table S8. Illustration of A-B-A competition SPR analysis of Tlp10<sup>LBD</sup>Y115A.

Table S9. Illustration of A-B-A competition SPR analysis of Tlp10<sup>LBD</sup>Y120A.

Table S10. Illustration of A-B-A competition SPR analysis of Tlp10<sup>LBD</sup>H193A.

Table S11. Analysis of protein-protein interactions with Tlp10<sup>sig</sup> using the yeast two-hybrid system.

Table S12. Fusion proteins for yeast two-hybrid experiments.

Table S13. Microbial strains and plasmids used in this study.

Table S14. DNA primers used in this study.

Table S15. MIRAGE glycan and small-molecule arrays for Tlp10.

Legends for movies S1 to S3

**Other Supplementary Material for this manuscript includes the following:**

(available at [stke.sciencemag.org/cgi/content/full/14/664/eabc8521/DC1](http://stke.sciencemag.org/cgi/content/full/14/664/eabc8521/DC1))

Movie S1 (.avi format). *C. jejuni* migrate toward the attractant isoleucine.

Movie S2 (.avi format). Migration of *C. jejuni* cells toward the attractant isoleucine is reduced by addition of the repellent arginine.

Movie S3 (.avi format). PBS control for the effect of arginine on the migration of WT *C. jejuni* toward isoleucine.

Data file S1 (Microsoft Excel format). Proteins included in DAHL domain MSA.

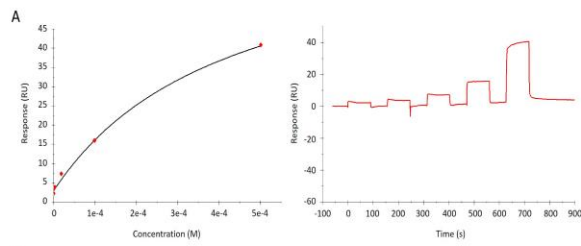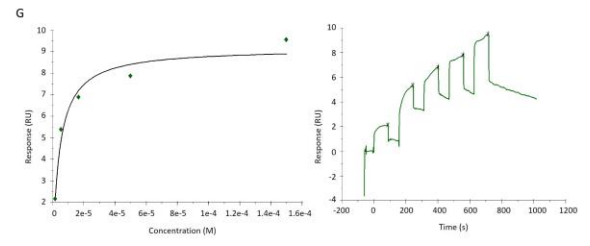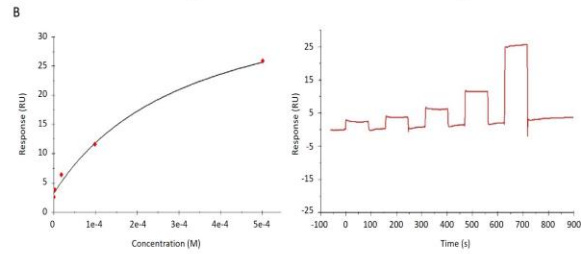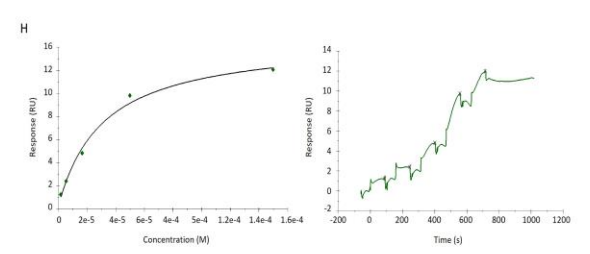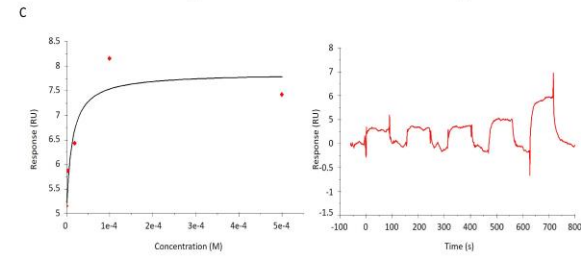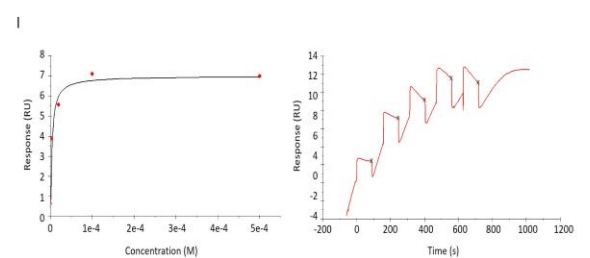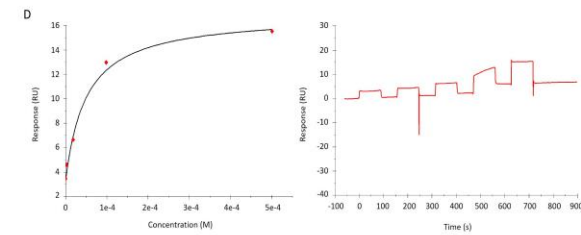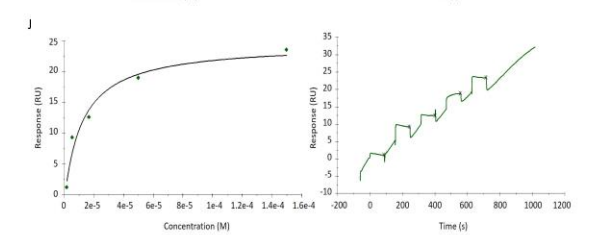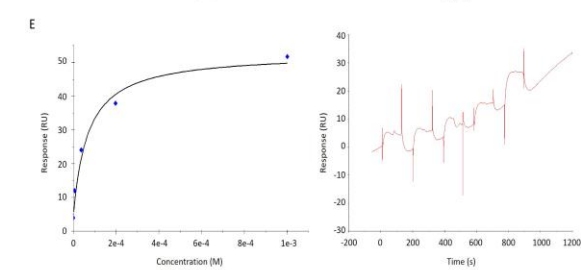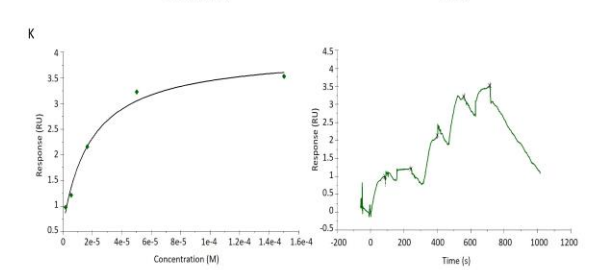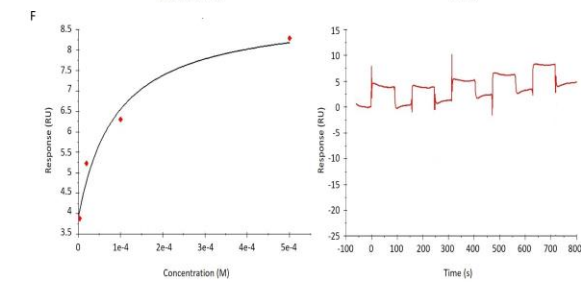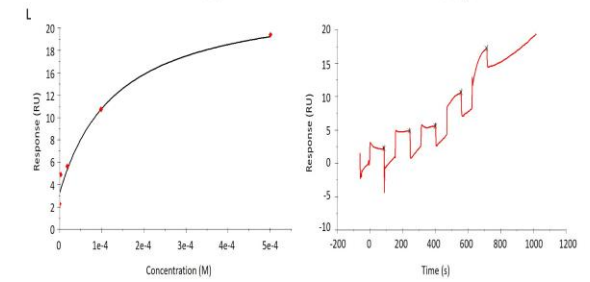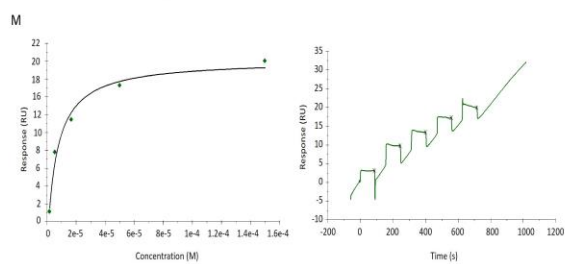

**Fig. S1. Representative sensorgrams from SPR analysis of the interaction of Tlp10<sup>LBD</sup> with various ligands.** Single-cycle SPR curves showing concentration-dependent interactions between Tlp10<sup>LBD</sup> and (A)  $\alpha$ -ketoglutarate; (B) malate; (C) aspartate; (D) thiamine; (E) fucose; (F) mannose; (G) sialic acid; (H) isoleucine; (I) galactose; (J) rhamnose; (K) purine; (L) fumarate; and (M) arginine. Data are representative of three independent experiments ( $n = 3$ ).

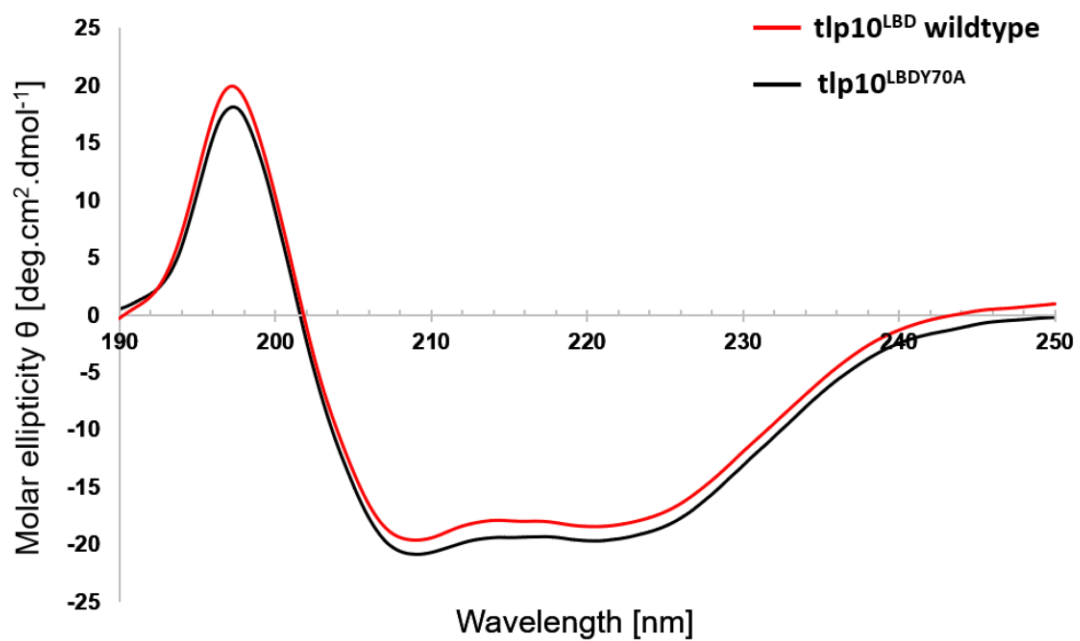

**Fig. S2. Mutant  $\text{Tlp10}^{\text{LBD}}$  proteins are correctly folded.** Far-UV CD (circular dichroism) spectrum for WT and Y70A  $\text{Tlp10}^{\text{LBD}}$ . This spectrum is representative of the similarity of all the mutant variants to that of the WT protein. Data are representative of three independent replicates ( $n = 3$ ).

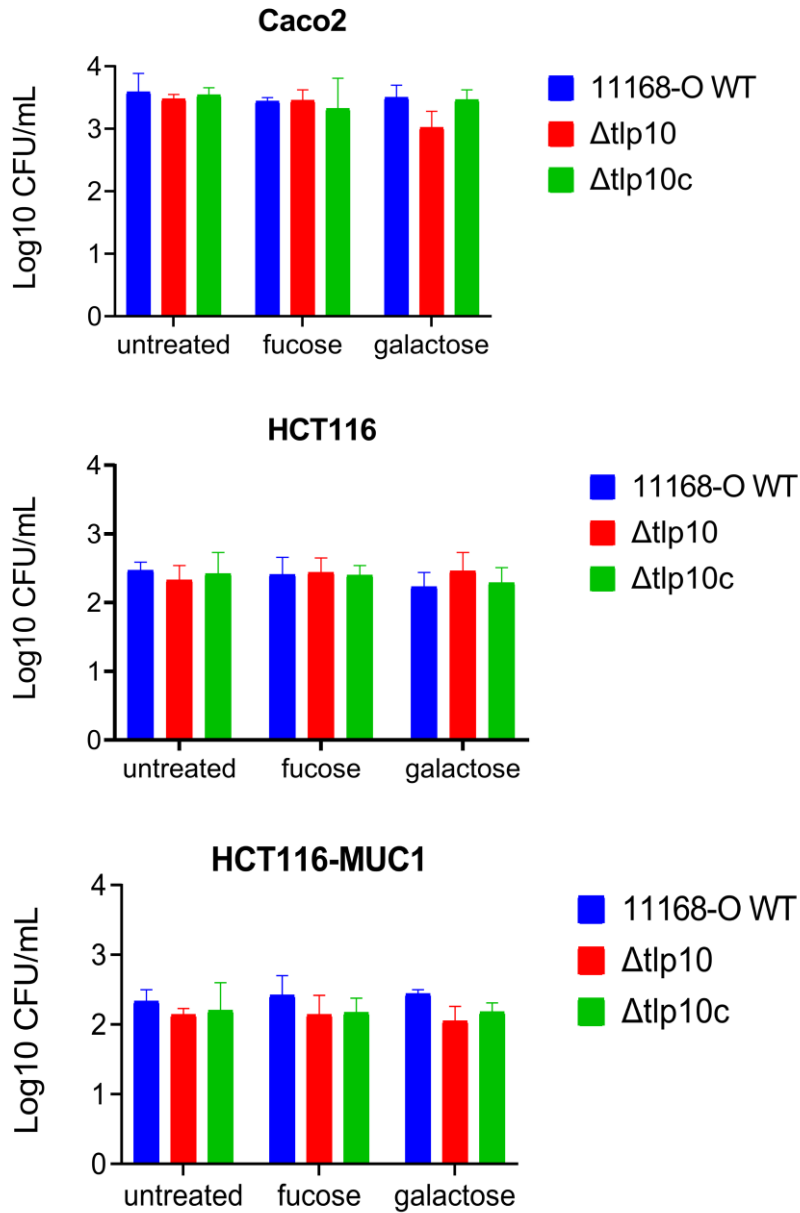

**Fig. S3. Invasion of mammalian cells by WT and mutant *C. jejuni* in the presence and absence of fucose and galactose.** Invasion analyses of Caco2, HCT166, and HCT166 overexpressing MUC1 (HCT116-MUC1) are presented as the mean of invasion from three technical replicates and are representative of three independent experiments ( $n = 3$ ).

**Table S1. HHpred search results for small subset of DAHL domains from various species.** No known domain was detected in the periplasmic region of Tlp10 and homologous sequences. Low-confidence hits to partial human Nucleoporin\_FG2 (Pfam accession number PF15967.5) domain and nuclear pore complex protein Nup155 are likely the result of  $\alpha$ -helical nature of these proteins.

| <b>with TM regions excluded</b>  |                                           |                |                                    |             |              |          |
|----------------------------------|-------------------------------------------|----------------|------------------------------------|-------------|--------------|----------|
| NCBI ID                          | Organism                                  | Number of hits | Best hit                           | Probability | E-value      | Score    |
| WP_0028<br>65311.1               | <i>C. jejuni subsp. jejuni</i> NCTC 11168 | 4              | 5IJO_T Nuclear pore complex Nup155 | 61          | 3.00<br>E+02 | 28       |
| WP_0124<br>78065.1               | <i>Agrobacterium tumefaciens</i>          | 16             | PF15967.5 ;<br>Nucleoporin_FG2     | 83.4        | 54           | 29.<br>7 |
| WP_0144<br>73835.1               | <i>Arcobacter sp. L</i>                   | 9              | 5IJO_T Nuclear pore complex Nup155 | 85.6        | 43           | 30.<br>3 |
| WP_0679<br>81710.1               | <i>Neptuniibacter pectenicola</i>         | 11             | 5IJO_T Nuclear pore complex Nup155 | 69.7        | 1.30<br>E+02 | 27       |
| WP_0842<br>74768.1               | <i>Nitratiruptor tergarcus</i>            | 17             | 5IJO_T Nuclear pore complex Nup155 | 82.6        | 54           | 29.<br>2 |
| WP_0699<br>56973.1               | <i>Magnetovibrio blakemorei</i>           | 10             | PF15967.5 ;<br>Nucleoporin_FG2     | 79.1        | 80           | 28.<br>9 |
| WP_0109<br>53844.1               | <i>Pseudomonas putida</i> KT2440          | 19             | 5IJO_T Nuclear pore complex Nup155 | 88.4        | 31           | 31.<br>6 |
| WP_0151<br>53106.1               | <i>Chroococciopsis thermalis</i>          | 16             | PF15967.5 ;<br>Nucleoporin_FG2     | 78.7        | 81           | 28.<br>7 |
| <b>with TMs regions included</b> |                                           |                |                                    |             |              |          |
| NCBI ID                          | Organism                                  | Number of hits | Best hit                           | Probability | E-value      | Score    |
| WP_0028<br>65311.1               | <i>C. jejuni subsp. jejuni</i> NCTC 11168 | 73             | PF15967.5 ;<br>Nucleoporin_FG2     | 95.6        | 3.1          | 38.<br>7 |
| WP_0124<br>78065.1               | <i>Agrobacterium tumefaciens</i>          | 44             | 5IJO_T Nuclear pore complex Nup155 | 92.8        | 11           | 34.<br>2 |
| WP_0144<br>73835.1               | <i>Arcobacter sp. L</i>                   | 84             | 5IJO_T Nuclear pore complex Nup155 | 94.9        | 4.8          | 37       |
| WP_0679<br>81710.1               | <i>Neptuniibacter pectenicola</i>         | 50             | 5IJO_T Nuclear pore complex Nup155 | 89          | 28           | 32       |
| WP_0842<br>74768.1               | <i>Nitratiruptor tergarcus</i>            | 41             | 5IJO_T Nuclear pore complex Nup155 | 89.5        | 27           | 32.<br>2 |
| WP_0699<br>56973.1               | <i>Magnetovibrio blakemorei</i>           | 54             | 5IJO_T Nuclear pore complex Nup155 | 91.5        | 17           | 33.<br>4 |
| WP_0109<br>53844.1               | <i>Pseudomonas putida</i> KT2440          | 78             | 5IJO_T Nuclear pore complex Nup155 | 91.4        | 19           | 33.<br>7 |
| WP_0151<br>53106.1               | <i>Chroococciopsis thermalis</i>          | 29             | 5IJO_T Nuclear pore complex Nup155 | 89.8        | 25           | 32.<br>3 |

**Table S2. Molecules included in the glycan microarray.**

| Number                 | Spacer form of saccharide                                             | Common name               | Short name | Molecular weight |
|------------------------|-----------------------------------------------------------------------|---------------------------|------------|------------------|
| <b>MONOSACCHARIDES</b> |                                                                       |                           |            |                  |
| 1                      | Fuc $\alpha$ -sp3                                                     | L- $\alpha$ -Fuc          | aF         | 221.3            |
| 2                      | Gal $\alpha$ -sp3                                                     | $\alpha$ -Gal             | aA         | 237.3            |
| 3                      | Gal $\beta$ -sp3                                                      | $\beta$ -Gal              | bA         | 237.3            |
| 4                      | GalNAc $\alpha$ -sp0                                                  | TnSer                     | TnSer      | 308.3            |
| 5                      | GalNAc $\alpha$ -sp3                                                  | T <sub>n</sub>            | Tn         | 278.3            |
| 6                      | GalNAc $\beta$ -sp3                                                   | $\beta$ -GalNAc           | bAN        | 278.3            |
| 7                      | Glc $\alpha$ -sp3                                                     | $\alpha$ -Glc             | aG         | 237.3            |
| 9                      | Glc $\beta$ -sp3                                                      | $\beta$ -Glc              | bG         | 237.3            |
| 10                     | GlcNAc $\beta$ -sp3                                                   | $\beta$ -GlcNAc           | GN         | 278.3            |
| 14                     | GlcN(Gc) $\beta$ -sp4                                                 | $\beta$ -GlcN(Gc)         | bGN(Gc)    | 293.3            |
| 15                     | HOCH <sub>2</sub> (HOCH) <sub>4</sub> CH <sub>2</sub> NH <sub>2</sub> | aminoglucitol             | glucitol   | 181.2            |
| 16                     | Man $\alpha$ -sp3                                                     | $\alpha$ -Man             | aM         | 273.3            |
| 18                     | Man $\beta$ -sp4                                                      | $\beta$ -Man              | bM         | 236.2            |
| 19                     | ManNAc $\beta$ -sp4                                                   | $\beta$ -ManAc            | bMN        | 277.3            |
| 20                     | Rha $\alpha$ -sp3                                                     | L- $\alpha$ -Rha          | aR         | 221.3            |
| 22                     | GlcNAc $\beta$ -sp4                                                   | $\beta$ -GlcNAc           | GN-Gly     | 277.3            |
| 37                     | 3-O-Su-Gal $\beta$ -sp3                                               | 3-O-Su- $\beta$ -Gal      | bA3Su      | 317.3            |
| 38                     | 3-O-Su-GalNAc $\alpha$ -sp3                                           | 3-O-Su- $\beta$ -GalNAc   | bAN3Su     | 358.4            |
| 43                     | 6-O-Su-GlcNAc $\beta$ -sp3                                            | 6-O-Su- $\beta$ -GlcNAc   | GN6su      | 358.4            |
| 44                     | GlcA $\alpha$ -sp3                                                    | $\alpha$ -glucuronic acid | aGU        | 251.2            |
| 45                     | GlcA $\beta$ -sp3                                                     | $\beta$ -glucuronic acid  | bGU        | 251.2            |
| 46                     | 6-H <sub>2</sub> PO <sub>3</sub> Glc $\beta$ -sp4                     | $\beta$ -Glc6P            | G6P        | 316.2            |
| 47                     | 6-H <sub>2</sub> PO <sub>3</sub> Man $\alpha$ -sp3                    | $\alpha$ -Man6P           | M6P        | 339.2            |
| 48                     | Neu5Ac $\alpha$ -sp3                                                  | $\alpha$ -Neu5Ac          | Sia        | 366.4            |
| 49                     | Neu5Ac $\alpha$ -sp9                                                  | $\alpha$ -Neu5AcBn        | Sia-Bn     | 471.5            |
| 52                     | Neu5Gc $\alpha$ -sp3                                                  | $\alpha$ -Neu5Gc          | aNeuGc     | 382.4            |
| 54                     | 9-Nac-Neu5Ac $\alpha$ -sp3                                            | 9-Nac- $\alpha$ -Neu5Ac   | 9NAcSia    | 407.4            |
| 55                     | 3-O-Su-GlcNAc $\beta$ -sp3                                            | 3-O-Su- $\beta$ -GlcNAc   | GN3Su      | 358.4            |
| <b>DISACCHARIDES</b>   |                                                                       |                           |            |                  |
| 71                     | Fuc $\alpha$ 1-2Gal $\beta$ -sp3                                      | H <sub>di</sub>           | Hdi        | 383.4            |
| 72                     | Fuc $\alpha$ 1-3GlcNAc $\beta$ -sp3                                   |                           | Fa3GN      | 424.5            |



|     |                                         |                  |          |       |
|-----|-----------------------------------------|------------------|----------|-------|
| 73  | Fuca1-4GlcNAc $\beta$ -sp3              | Le               | LeC      | 424.5 |
| 75  | Gal $\alpha$ 1-2Gal $\beta$ -sp3        |                  | Aa2A     | 399.4 |
| 76  | Gal $\alpha$ 1-3Gal $\beta$ -sp3        | B <sub>di</sub>  | Bdi      | 399.4 |
| 77  | Gal $\alpha$ 1-3GalNAc $\beta$ -sp3     | T $\alpha\beta$  | Tab      | 440.5 |
| 78  | Gal $\alpha$ 1-3GalNAc $\alpha$ -sp3    | T $\alpha\alpha$ | Taa      | 440.5 |
| 80  | Gal $\alpha$ 1-3GlcNAc $\beta$ -sp3     |                  | Aa3GN    | 440.5 |
| 81  | Gal $\alpha$ 1-4GlcNAc $\beta$ -sp3     | $\alpha$ -LacNAc | aLN      | 440.5 |
| 83  | Gal $\alpha$ 1-6Glc $\beta$ -sp4        | Melibiose        | Aa3G     | 398.4 |
| 84  | Gal $\beta$ 1-2Gal $\beta$ -sp3         |                  | Ab2A     | 399.4 |
| 85  | Gal $\beta$ 1-3GlcNAc $\beta$ -sp3      | Le <sup>c</sup>  | LeC      | 440.5 |
| 87  | Gal $\beta$ 1-3Gal $\beta$ -sp3         |                  | Ab3A     | 399.4 |
| 88  | Gal $\beta$ 1-3GalNAc $\beta$ -sp3      | T $\beta\beta$   | Tbb      | 440.5 |
| 89  | Gal $\beta$ 1-3GalNAc $\alpha$ -sp3     | TF               | TF       | 440.5 |
| 93  | Gal $\beta$ 1-4Glc $\beta$ -sp4         | Lac              | Lac-Gly  | 398.4 |
| 94  | Gal $\beta$ 1-4Gal $\beta$ -sp4         |                  | Ab4A     | 398.4 |
| 97  | Gal $\beta$ 1-4GlcNAc $\beta$ -sp3      | LacNAc           | LN       | 440.5 |
| 100 | Gal $\beta$ 1-6Gal $\beta$ -sp4         |                  | Ab6A     | 398.4 |
| 101 | GalNAc $\alpha$ 1-3GalNAc $\beta$ -sp3  | Fs-2             | Fs-2     | 481.5 |
| 102 | GalNAc $\alpha$ 1-3Gal $\beta$ -sp3     | A <sub>di</sub>  | Adi      | 440.5 |
| 103 | GalNAc $\alpha$ 1-3GalNAc $\alpha$ -sp3 | core 5           | core 5   | 481.5 |
| 104 | GalNAc $\beta$ 1-3Gal $\beta$ -sp3      |                  | ANb3A    | 440.5 |
| 106 | GalNAc $\beta$ 1-4GlcNAc $\beta$ -sp3   | LacdiNAc         | LacdiNAc | 481.5 |
| 110 | Glc $\alpha$ 1-4Glc $\beta$ -sp3        | maltose          | Malt2    | 399.4 |
| 111 | Glc $\beta$ 1-4Glc $\beta$ -sp4         | cellobiose       | cello    | 398.4 |
| 112 | Glc $\beta$ 1-6Glc $\beta$ -sp4         | gentiobiose      | gent     | 398.4 |
| 113 | GlcNAc $\beta$ 1-3GalNAc $\alpha$ -sp3  | core 3           | core 3   | 481.5 |
| 114 | GlcNAc $\beta$ 1-3Man $\beta$ -sp4      |                  | GN3M     | 439.4 |
| 115 | GlcNAc $\beta$ 1-4GlcNAc $\beta$ -Asn   | chitobiose-Asn   | Ch2-Asn  | 538.5 |
| 117 | GlcNAc $\beta$ 1-4GlcNAc $\beta$ -sp4   | chitobiose       | Ch2-Gly  | 480.5 |
| 118 | GlcNAc $\beta$ 1-6GalNAc $\alpha$ -sp3  | core 6           | core 6   | 481.5 |
| 119 | Man $\alpha$ 1-2Man $\beta$ -sp4        |                  | Ma2Mb    | 398.4 |
| 120 | Man $\alpha$ 1-3Man $\beta$ -sp4        |                  | Ma3M     | 398.4 |
| 121 | Man $\alpha$ 1-4Man $\beta$ -sp4        |                  | Ma4M     | 398.4 |
| 122 | Man $\alpha$ 1-6Man $\beta$ -sp4        |                  | Ma6M     | 398.4 |
| 123 | Man $\beta$ 1-4GlcNAc $\beta$ -sp4      |                  | Mb4GN    | 439.4 |

|     |                                                                                                  |                              |                         |                          |
|-----|--------------------------------------------------------------------------------------------------|------------------------------|-------------------------|--------------------------|
| 124 | Man $\alpha$ 1-2Man $\alpha$ -sp4                                                                |                              | Ma2Ma                   | 398.4                    |
| 145 | Gal $\beta$ 1-3(6-O-Su)GlcNAc $\beta$ -sp3                                                       | 6-O-Su-Le <sup>c</sup>       | LeC6Su                  | 520.5                    |
| 146 | Gal $\beta$ 1-4(6-O-Su)Glc $\beta$ -sp2                                                          | 6-O-Su-Lac                   | Lac6Su                  | 465.5                    |
| 147 | Gal $\beta$ 1-4(6-O-Su)GlcNAc $\beta$ -sp3                                                       | 6-O-Su-LacNAc                | LN6Su                   | 520.5                    |
| 149 | GlcNAc $\beta$ 1-4(6-O-Su)GlcNAc $\beta$ -sp2                                                    | 6-O-Su-chitobiose            | Ch2-6Su                 | 547.5                    |
| 150 | 3-O-Su-Gal $\beta$ 1-3GalNAc $\alpha$ -sp3                                                       | 3`-O-Su-TF                   | TF3`Su                  | 520.5                    |
| 151 | 6-O-Su-Gal $\beta$ 1-3GalNAc $\alpha$ -sp3                                                       | 6`-O-Su-TF                   | TF6`Su                  | 520.5                    |
| 152 | 3-O-Su-Gal $\beta$ 1-4Glc $\beta$ -sp2                                                           | SM3                          | Lac3`Su                 | 465.3                    |
| 153 | 6-O-Su-Gal $\beta$ 1-4Glc $\beta$ -sp2                                                           | 6`-O-Su-Lac                  | Lac6`Su                 | 465.3                    |
| 155 | 3-O-Su-Gal $\beta$ 1-3GlcNAc $\beta$ -sp3                                                        | 3`-O-Su-Le <sup>c</sup>      | LeC3`Su                 | 520.5                    |
| 157 | 3-O-Su-Gal $\beta$ 1-4GlcNAc $\beta$ -sp3                                                        | 3`-O-Su-LacNAc               | LN3`Su                  | 520.5                    |
| 159 | 4-O-Su-Gal $\beta$ 1-4GlcNAc $\beta$ -sp3                                                        | 4`-O-Su-LacNAc               | LN4`Su                  | 520.5                    |
| 161 | 6-O-Su-Gal $\beta$ 1-3GlcNAc $\beta$ -sp3                                                        | 6`-O-Su-Le <sup>c</sup>      | LeC6`Su                 | 520.5                    |
| 163 | 6-O-Su-Gal $\beta$ 1-4GlcNAc $\beta$ -sp3                                                        | 6`-O-Su-LacNAc               | LN6`Su                  | 520.5                    |
| 164 | GlcA $\beta$ 1-3GlcNAc $\beta$ -sp3                                                              |                              | GUb3GN                  | 454.4                    |
| 165 | GlcA $\beta$ 1-3Gal $\beta$ -sp3                                                                 |                              | GUb3A                   | 413.4                    |
| 166 | GlcA $\beta$ 1-6Gal $\beta$ -sp3                                                                 |                              | GUb6A                   | 413.4                    |
| 167 | GlcNAc $\beta$ 1-4-[HOOC(CH <sub>3</sub> )CH]-3-O-GlcNAc $\beta$ -sp4                            | GlcNAc-Mur                   | GN-Mur                  | 522.5                    |
| 168 | GlcNAc $\beta$ 1--[HOOC(CH <sub>3</sub> )CH]-3-O-GlcNAc $\beta$ -L-alanyl-D-i-glutaminy-L-lysine | GMDP-Lys                     | GMDPLys                 | 823.9                    |
| 169 | Neu5Ac $\alpha$ 2-3Gal $\beta$ -sp3                                                              | GM4                          | GM4                     | 528.5                    |
| 170 | Neu5Ac $\alpha$ 2-6Gal $\beta$ -sp3                                                              |                              | Sia6A                   | 528.5                    |
| 171 | Neu5Ac $\alpha$ 2-3GalNAc $\alpha$ -sp3                                                          | 3-SiaT <sub>n</sub>          | 3-SiaT <sub>n</sub>     | 569.6                    |
| 172 | Neu5Ac $\alpha$ 2-6GalNAc $\alpha$ -sp3                                                          | SiaT <sub>n</sub>            | SiaT <sub>n</sub>       | 569.6                    |
| 174 | Neu5Gc $\alpha$ 2-6GalNAc $\alpha$ -sp3                                                          | NeuGc-T <sub>n</sub>         | Neu5GC T <sub>n</sub>   | 585.6                    |
| 176 | 3-O-Su-Gal $\beta$ 1-4(6-O-Su)Glc $\beta$ -sp2                                                   | 3`,6-di-O-Su-Lac             | Lac3`,6Su <sub>u2</sub> | 567.5 (Na <sup>+</sup> ) |
| 177 | 3-O-Su-Gal $\beta$ 1-4(6-O-Su)GlcNAc $\beta$ -sp2                                                | 3`,6-di-O-Su-LacNAc          | LN3`6Su <sub>2</sub>    | 622.6 (Na <sup>+</sup> ) |
| 178 | 6-O-Su-Gal $\beta$ 1-4(6-O-Su)Glc $\beta$ -sp2                                                   | 6,6`-di-O-Su-Lac             | Lac6,6`S <sub>u2</sub>  | 567.5 (Na <sup>+</sup> ) |
| 179 | 6-O-Su-Gal $\beta$ 1-3(6-O-Su)GlcNAc $\beta$ -sp2                                                | 6,6`-di-O-Su-Le <sup>c</sup> | LeC6,6`S <sub>u2</sub>  | 608.5 (Na <sup>+</sup> ) |
| 180 | 6-O-Su-Gal $\beta$ 1-4(6-O-Su)GlcNAc $\beta$ -sp2                                                | 6,6`-di-O-Su-LacNAc          | LN66`Su <sub>2</sub>    | 608.5 (Na <sup>+</sup> ) |
| 181 | 3,4-O-Su <sub>2</sub> -Gal $\beta$ 1-4GlcNAc $\beta$ -sp3                                        | 3`,4`-di-O-Su-LacNAc         | LN3`4`S <sub>u2</sub>   | 622.6 (Na <sup>+</sup> ) |

|                       |                                                                   |                                        |                                               |                          |
|-----------------------|-------------------------------------------------------------------|----------------------------------------|-----------------------------------------------|--------------------------|
| 182                   | 3,6-O-Su <sub>2</sub> -Galβ1-4GlcNAcβ-sp <sub>2</sub>             | 3',6'-di-O-Su-LacNAc                   | LN3'6'Su <sub>2</sub>                         | 608.5 (Na <sup>+</sup> ) |
| 183                   | 4,6-O-Su <sub>2</sub> -Galβ1-4GlcNAcβ-sp <sub>2</sub>             | 4',6'-di-O-Su-LacNAc                   | LN4'6'Su <sub>2</sub>                         | 608.5 (Na <sup>+</sup> ) |
| 184                   | 4,6-O-Su <sub>2</sub> -Galβ1-4GlcNAcβ-sp <sub>3</sub>             | 4',6'-di-O-Su-LacNAc                   | LN4'6'Su <sub>2</sub> -C3                     | 622.6 (Na <sup>+</sup> ) |
| 186                   | Neu5Acα2-8Neu5Acα2-sp <sub>3</sub>                                | (Sia) <sub>2</sub>                     | (Sia) <sub>2</sub>                            | 679.6 (Na <sup>+</sup> ) |
| 189                   | 3,6-O-Su <sub>2</sub> -Galβ1-4(6-O-Su)GlcNAcβ-sp <sub>2</sub>     | 3',6,6'-tri-O-Su-LacNAc                | LN3'66'Su <sub>3</sub>                        | 710.6 (Na <sup>+</sup> ) |
| 192                   | GalNAcβ1-4(6-O-Su)GlcNAcβ-sp <sub>3</sub>                         | 6-O-Su-LacdiNAc                        | LacdiNAc <sub>6</sub> Su                      | 561.5                    |
| 193                   | 3-O-Su-GalNAcβ1-4GlcNAcβ-sp <sub>3</sub>                          | 3'-O-Su-LacdiNAc                       | LacdiNAc <sub>3</sub> 'Su                     | 561.5                    |
| 194                   | 6-O-Su-GalNAcβ1-4GlcNAcβ-sp <sub>3</sub>                          | 6'-O-Su-LacdiNAc                       | LacdiNAc <sub>6</sub> 'Su                     | 561.5                    |
| 195                   | 6-O-Su-GalNAcβ1-4-(3-O-Su)GlcNAcβ-sp <sub>3</sub>                 | 6'-Su-3-O-Ac-LacdiNAc                  | 3Ac-LacdiNAc <sub>6</sub> 'Su                 | 603.5                    |
| 196                   | 3-O-Su-GalNAcβ1-4(3-O-Su)-GlcNAcβ-sp <sub>3</sub>                 | 3,3'-O-Su <sub>2</sub> -LacdiNAc       | LacdiNAc <sub>3,3</sub> 'Su <sub>2</sub>      | 663.5(Na <sup>+</sup> )  |
| 197                   | 3,6-O-Su <sub>2</sub> -GalNAcβ1-4GlcNAcβ-sp <sub>3</sub>          | 3',6'-Su <sub>2</sub> -LacdiNAc        | LacdiNAc <sub>3',6</sub> 'Su <sub>2</sub>     | 663.5(Na <sup>+</sup> )  |
| 198                   | 4,6-O-Su <sub>2</sub> -GalNAcβ1-4GlcNAcβ-sp <sub>3</sub>          | 4',6'-Su <sub>2</sub> -LacdiNAc        | LacdiNAc <sub>4',6</sub> 'Su <sub>2</sub>     | 663.5(Na <sup>+</sup> )  |
| 199                   | 4,6-O-Su <sub>2</sub> -GalNAcβ1-4-(3-O-Ac)GlcNAcβ-sp <sub>3</sub> | 4',6'-Su <sub>2</sub> -3-O-Ac-LacdiNAc | 3Ac-LacdiNAc <sub>4',6</sub> 'Su <sub>2</sub> | 705.5(Na <sup>+</sup> )  |
| 200                   | 4-O-Su-GalNAcβ1-4GlcNAcβ-sp <sub>3</sub>                          | 4'-O-Su-LacdiNAc                       | LacdiNAc <sub>4</sub> 'Su                     | 561.5                    |
| 201                   | 3,4-O-Su <sub>2</sub> -Galβ1-4GlcNAcβ-sp <sub>3</sub>             | 3',4'-Su <sub>2</sub> -LacdiNAc        | LacdiNAc <sub>3',4</sub> 'Su <sub>2</sub>     | 663.5(Na <sup>+</sup> )  |
| 202                   | 6-O-Su-GalNAcβ1-4(6-O-Su)GlcNAcβ-sp <sub>3</sub>                  | 6,6'-O-Su-LacdiNAc                     | LacdiNAc <sub>6,6</sub> 'Su <sub>2</sub>      | 663.5(Na <sup>+</sup> )  |
| 203                   | Galβ1-4(6-O-Su)GlcNAcβ-sp <sub>2</sub>                            | 6-O-Su-LacNAc                          | LN6Su                                         | 506.5                    |
| 204                   | 4-O-Su-GalNAcβ1-4GlcNAcβ-sp <sub>2</sub>                          | 4'-O-Su-LacdiNAc                       | LacdiNAc <sub>4</sub> 'Su-C2                  | 547.5                    |
| 205                   | Neu5Acα2-6GalNAcβ-sp <sub>3</sub>                                 |                                        | 6SiaANb                                       | 569.6                    |
| 206                   | Neu5Gcα2-3Gal-sp <sub>3</sub>                                     | NeuGcα3Gal                             | Neu5Gc3A                                      | 544.5                    |
| <b>TRISACCHARIDES</b> |                                                                   |                                        |                                               |                          |
| 215                   | Fucα1-2Galβ1-3GlcNAcβ-sp <sub>3</sub>                             | Le <sup>d</sup> .H (type 1)            | LeD                                           | 586.6                    |
| 216                   | Fucα1-2Galβ1-4GlcNAcβ-sp <sub>3</sub>                             | H (type 2)                             | Htype2                                        | 586.6                    |
| 217                   | Fucα1-2Galβ1-3GalNAcα-sp <sub>3</sub>                             | H (type 3)                             | Htype3                                        | 586.6                    |
| 219                   | Fucα1-2Galβ1-4Glcβ-sp <sub>4</sub>                                | H (type 6)                             | Htype6                                        | 544.5                    |
| 220                   | Galα1-3Galβ1-4Glcβ-sp <sub>2</sub>                                |                                        | Aa3'Lac-C2                                    | 547.5                    |

|     |                                                             |                                          |         |       |
|-----|-------------------------------------------------------------|------------------------------------------|---------|-------|
| 222 | Gal $\alpha$ 1-3Gal $\beta$ 1-4GlcNAc $\beta$ -sp3          | Galili (tri)                             | Galili3 | 602.6 |
| 224 | Gal $\alpha$ 1-4Gal $\beta$ 1-4Glc $\beta$ -sp3             | P <sup>k</sup> , Gb3, GbOse <sub>3</sub> | Pk      | 561.5 |
| 225 | Gal $\alpha$ 1-4Gal $\beta$ 1-4GlcNAc-sp2                   | P <sub>1</sub>                           | P1      | 588.6 |
| 226 | Fuc $\alpha$ 1-2(Gal $\alpha$ 1-3)Gal $\beta$ -sp3          | B <sub>tri</sub>                         | Btri    | 545.5 |
| 228 | Gal $\beta$ 1-2Gal $\alpha$ 1-4GlcNAc $\beta$ -sp4          |                                          | Ab2aLN  | 601.6 |
| 229 | Gal $\beta$ 1-3Gal $\beta$ 1-4GlcNAc $\beta$ -sp4           |                                          | Ab3`LN  | 601.6 |
| 231 | Gal $\beta$ 1-4GlcNAc $\beta$ 1-3GalNAc $\alpha$ -sp3       |                                          | LN3Tn   | 643.6 |
| 232 | Gal $\beta$ 1-4GlcNAc $\beta$ 1-6GalNAc $\alpha$ -sp3       |                                          | LN6Tn   | 643.6 |
| 233 | Gal $\beta$ 1-3(Fuc $\alpha$ 1-4)GlcNAc $\beta$ -sp3        | Le <sup>a</sup>                          | LeA     | 586.6 |
| 234 | Fuc $\alpha$ 1-3(Gal $\beta$ 1-4)GlcNAc $\beta$ -sp3        | Le <sup>x</sup>                          | LeX     | 586.6 |
| 235 | Fuc $\alpha$ 1-2(GalNAc $\alpha$ 1-3)Gal $\beta$ -sp3       | A <sub>tri</sub>                         | Atri    | 586.6 |
| 238 | GalNAc $\beta$ 1-4Gal $\beta$ 1-4Glc $\beta$ -sp3           | GA <sub>2</sub> , GgOse <sub>3</sub>     | GA2     | 602.6 |
| 240 | (Glc $\alpha$ 1-4) <sub>3</sub> $\beta$ -sp4                | maltotriose                              | (Ga4)3b | 560.5 |
| 241 | (Glc $\alpha$ 1-6) <sub>3</sub> $\beta$ -sp4                | isomaltotriose                           | (Ga6)3b | 560.5 |
| 246 | GlcNAc $\beta$ 1-2Gal $\beta$ 1-3GalNAc $\alpha$ -sp3       |                                          | GN2`TF  | 643.6 |
| 247 | GlcNAc $\beta$ 1-3Gal $\beta$ 1-3GalNAc $\alpha$ -sp3       |                                          | GN3`TF  | 643.6 |
| 248 | GlcNAc $\beta$ 1-3Gal $\beta$ 1-4Glc $\beta$ -sp2           |                                          | GN3`Lac | 588.6 |
| 250 | GlcNAc $\beta$ 1-3Gal $\beta$ 1-4GlcNAc $\beta$ -sp3        |                                          | GN3`LN  | 643.6 |
| 251 | GlcNAc $\beta$ 1-4Gal $\beta$ 1-4GlcNAc $\beta$ -sp2        |                                          | GN4`LN  | 629.6 |
| 252 | GlcNAc $\beta$ 1-4GlcNAc $\beta$ 1-4GlcNAc $\beta$ -sp4     | chitotriose                              | Ch3     | 683.6 |
| 253 | GlcNAc $\beta$ 1-6Gal $\beta$ 1-4GlcNAc $\beta$ -sp2        |                                          | GN6`LN  | 629.6 |
| 254 | Gal $\beta$ 1-3(GlcNAc $\beta$ 1-6)GalNAc $\alpha$ -sp3     | core 2                                   | core 2  | 643.6 |
| 255 | GlcNAc $\beta$ 1-3(GlcNAc $\beta$ 1-6)GalNAc $\alpha$ -sp3  | core 4                                   | core 4  | 684.7 |
| 258 | Man $\alpha$ 1-3(Man $\alpha$ 1-6)Man $\beta$ -sp4          | Man <sub>3</sub>                         | (Ma)3b  | 560.5 |
| 262 | Gal $\beta$ 1-3GalNAc $\beta$ 1-3Gal-sp4                    | T $\beta\beta$ -Gal                      | Tbb-A   | 601.6 |
| 264 | Gal $\beta$ 1-4Gal $\beta$ 1-4GlcNAc-sp3                    |                                          | Ab4`LN  | 602.6 |
| 287 | 3-O-Su-Gal $\beta$ 1-3(Fuc $\alpha$ 1-4)GlcNAc $\beta$ -sp3 | Su-Le <sup>a</sup>                       | 3`SuLeA | 666.7 |
| 288 | Fuc $\alpha$ 1-3(3-O-Su-Gal $\beta$ 1-4)GlcNAc $\beta$ -sp3 | Su-Le <sup>x</sup>                       | 3`SuLeX | 666.7 |
| 289 | Gal $\alpha$ 1-3(Neu5Ac $\alpha$ 2-                         | 6-SiaTF                                  | 6SiaTF  | 731.7 |

|                         |                                                                           |                             |                    |                |
|-------------------------|---------------------------------------------------------------------------|-----------------------------|--------------------|----------------|
|                         | 6)GalNAc $\alpha$ -sp3                                                    |                             |                    |                |
| 290                     | Gal $\beta$ 1-3(Neu5Ac $\alpha$ 2-6)<br>GalNAc $\alpha$ -sp3              |                             | A3a(Sia)<br>Tn     | 731.7          |
| 292                     | Neu5Ac $\alpha$ 2-3Gal $\beta$ 1-<br>3GalNAc $\alpha$ -sp3                | 3`-Sia-TF                   | Sia3`TF            | 731.7          |
| 293                     | Neu5Ac $\alpha$ 2-3Gal $\beta$ 1-4Glc $\beta$ -sp3                        | 3`SL                        | 3`SL               | 690.7          |
| 294                     | Neu5Ac $\alpha$ 2-3Gal $\beta$ 1-4Glc $\beta$ -sp4                        | 3`SL                        | 3`SL-Gly           | 689.6          |
| 295                     | Neu5Ac $\alpha$ 2-6Gal $\beta$ 1-4Glc $\beta$ -sp2                        | 6`SL                        | 6`SL-C2            | 676.6          |
| 298                     | Neu5Ac $\alpha$ 2-3Gal $\beta$ 1-<br>4GlcNAc $\beta$ -sp3                 | 3`SLN                       | 3`SLN              | 731.7          |
| 299                     | Neu5Ac $\alpha$ 2-3Gal $\beta$ 1-<br>3GlcNAc $\beta$ -sp3                 | 3`-SiaLe <sup>c</sup>       | 3`SiaLeC           | 731.7          |
| 300                     | Neu5Ac $\alpha$ 2-6Gal $\beta$ 1-<br>4GlcNAc $\beta$ -sp3                 | 6`SLN                       | 6`SLN              | 731.7          |
| 303                     | Neu5Gc $\alpha$ 2-3Gal $\beta$ 1-<br>4GlcNAc $\beta$ -sp3                 | 3`SLN (Gc)                  | 3`SLN(G<br>c)      | 747.7          |
| 304                     | Neu5Gc $\alpha$ 2-6Gal $\beta$ 1-<br>4GlcNAc $\beta$ -sp3                 | 6`SLN (Gc)                  | 6`SLN(G<br>c)      | 747.7          |
| 306                     | 9-NAc-Neu5Ac $\alpha$ 2-6Gal $\beta$ 1-<br>4GlcNAc $\beta$ -sp3           |                             | 9NAc-<br>6`SLN     | 788.8          |
| 315                     | Neu5Ac $\alpha$ 2-3Gal $\beta$ 1-4-(6-O-<br>Su)GlcNAc $\beta$ -sp3        | 6-Su-3`SLN                  | 3`SLN6S<br>u       | 833.8<br>(Na+) |
| 317                     | Neu5Ac $\alpha$ 2-3Gal $\beta$ 1-3-(6-O-<br>Su)GalNAc $\beta$ -sp3        | 6-Su-3`SiaTF                | 3`SiaTF6<br>Su     | 833.8<br>(Na+) |
| 318                     | Neu5Ac $\alpha$ 2-6Gal $\beta$ 1-4-(6-O-<br>Su)GlcNAc $\beta$ -sp3        | 6-Su-6`SLN                  | 6`SLN6S<br>u       | 833.8<br>(Na+) |
| 319                     | Neu5Ac $\alpha$ 2-3-(6-O-Su)Gal $\beta$ 1-<br>4GlcNAc $\beta$ -sp3        | 6`-Su-3`SLN                 | 3`SLN6`<br>Su      | 833.8<br>(Na+) |
| 321                     | (Neu5Ac $\alpha$ 2-8) <sub>3</sub> -sp3                                   | (Sia) <sub>3</sub>          | (Sia) <sub>3</sub> | 992.9<br>(Na+) |
| 323                     | Neu5Ac $\alpha$ 2-6Gal $\beta$ 1-3GlcNAc-<br>sp3                          | 6`-SiaLe <sup>c</sup>       | 6`SiaLeC           | 731.7          |
| 324                     | Neu5Ac $\alpha$ 2-6Gal $\beta$ 1-3(6-O-<br>Su)GlcNAc-sp3                  | 6Su-6`-SiaLe <sup>c</sup>   | 6`SiaLeC<br>6Su    | 883.8<br>(Na+) |
| 331                     | Neu5Gc $\alpha$ 2-3Gal $\beta$ 1-<br>3GlcNAc $\beta$ -sp3                 | 3`SiaLe <sup>c</sup> (Gc)   | 3`SiaLeC<br>(GC)   | 747.7          |
| <b>TETRASACCHARIDES</b> |                                                                           |                             |                    |                |
| 359                     | Fuc $\alpha$ 1-2(Gal $\alpha$ 1-3)Gal $\beta$ 1-<br>3GlcNAc $\beta$ -sp3  | B (type 1)                  | Btype1             | 748.7          |
| 360                     | Fuc $\alpha$ 1-2(Gal $\alpha$ 1-3)Gal $\beta$ 1-<br>4GlcNAc $\beta$ -sp3  | B (type 2)                  | Btype2             | 748.7          |
| 362                     | Fuc $\alpha$ 1-2(Gal $\alpha$ 1-3)Gal $\beta$ 1-<br>3GalNAc $\alpha$ -sp3 | B (type 3)                  | Btype3             | 748.7          |
| 363                     | Fuc $\alpha$ 1-2(Gal $\alpha$ 1-3)Gal $\beta$ 1-<br>3GalNAc $\beta$ -sp3  | B (type 4)                  | Btype4             | 748.7          |
| 364                     | Fuc $\alpha$ 1-3(Gal $\alpha$ 1-3Gal $\beta$ 1-<br>4)GlcNAc $\beta$ -sp3  | $\alpha$ GalLe <sup>x</sup> | aGalLeX            | 748.7          |

|     |                                                                           |                                  |                                  |       |
|-----|---------------------------------------------------------------------------|----------------------------------|----------------------------------|-------|
| 366 | Fuca1-2(GalNAc $\alpha$ 1-3)Gal $\beta$ 1-3GlcNAc $\beta$ -sp3            | A (type 1)                       | Atype1                           | 789.8 |
| 368 | Fuca1-2(GalNAc $\alpha$ 1-3)Gal $\beta$ 1-4GlcNAc $\beta$ -sp3            | A (type 2)                       | Atype2                           | 789.8 |
| 371 | Fuca1-2Gal $\beta$ 1-3(Fuca1-4)GlcNAc $\beta$ -sp3                        | Le <sup>b</sup>                  | LeB                              | 732.7 |
| 372 | Fuca1-3(Fuca1-2Gal $\beta$ 1-4)GlcNAc $\beta$ -sp3                        | Le <sup>y</sup>                  | LeY                              | 732.7 |
| 373 | Gal $\alpha$ 1-3Gal $\beta$ 1-4GlcNAc $\beta$ 1-3Gal $\beta$ -sp3         | Galili (tetra)                   | Galili4                          | 764.7 |
| 375 | Gal $\alpha$ 1-4GlcNAc $\beta$ 1-3Gal $\beta$ 1-4GlcNAc $\beta$ -sp3      |                                  | aLN3`LN                          | 805.8 |
| 376 | Gal $\beta$ 1-3GlcNAc $\beta$ 1-3Gal $\beta$ 1-4Glc $\beta$ -sp4          | LNT                              | LNT                              | 763.7 |
| 377 | Gal $\beta$ 1-3GlcNAc $\beta$ 1-3Gal $\beta$ 1-3GlcNAc $\beta$ -sp2       |                                  | LeCb3`LeC                        | 791.8 |
| 378 | Gal $\beta$ 1-3GlcNAc $\alpha$ 1-3Gal $\beta$ 1-4GlcNAc $\beta$ -sp3      |                                  | LeCa3`LN                         | 805.8 |
| 379 | Gal $\beta$ 1-3GlcNAc $\beta$ 1-3Gal $\beta$ 1-4GlcNAc $\beta$ -sp3       |                                  | LeCb3`LN                         | 805.8 |
| 380 | Gal $\beta$ 1-3GlcNAc $\alpha$ 1-6Gal $\beta$ 1-4GlcNAc $\beta$ -sp2      |                                  | LeCa6`LN                         | 791.8 |
| 381 | Gal $\beta$ 1-3GlcNAc $\beta$ 1-6Gal $\beta$ 1-4GlcNAc $\beta$ -sp2       |                                  | LeCb6`LN                         | 791.8 |
| 382 | Gal $\beta$ 1-3GalNAc $\beta$ 1-4Gal $\beta$ 1-4Glc $\beta$ -sp3          | Asialo-GM1                       | aGM1                             | 764.7 |
| 383 | Gal $\beta$ 1-4GlcNAc $\beta$ 1-3Gal $\beta$ 1-4Glc $\beta$ -sp2          | LNnT                             | LNnT                             | 763.7 |
| 385 | Gal $\beta$ 1-4GlcNAc $\beta$ 1-3Gal $\beta$ 1-4GlcNAc $\beta$ -sp3       | i                                | LNb3`LN                          | 805.8 |
| 387 | Gal $\beta$ 1-4GlcNAc $\beta$ 1-6Gal $\beta$ 1-4GlcNAc $\beta$ -sp2       |                                  | LNb6`LN                          | 791.7 |
| 388 | Gal $\beta$ 1-3(Gal $\beta$ 1-4GlcNAc $\beta$ 1-6)GalNAc $\alpha$ -sp3    |                                  | LNb6TF                           | 805.8 |
| 389 | GalNAc $\beta$ 1-3Gal $\alpha$ 1-4Gal $\beta$ 1-4Glc $\beta$ -sp3         | Gb4, P                           | Gb4                              | 764.7 |
| 390 | (Glc $\alpha$ 1-4) <sub>4</sub> $\beta$ -sp4                              | maltotetraose                    | (Ga4)4b                          | 722.7 |
| 391 | (Glc $\alpha$ 1-6) <sub>4</sub> $\beta$ -sp4                              | isomaltotetraose                 | (Ga6)4b                          | 722.7 |
| 392 | Fuca1-2(GalNAc $\alpha$ 1-3)Gal $\beta$ 1-3GalNAc $\alpha$ -sp3           | A (type 3)                       | A(type3)                         | 789.8 |
| 395 | GlcNAc $\beta$ 1-3(GlcNAc $\beta$ 1-6)Gal $\beta$ 1-4GlcNAc $\beta$ -sp3  | Tk                               | Tk                               | 832.8 |
| 401 | Gal $\beta$ 1-3GlcNAc $\beta$ 1-3Gal $\beta$ 1-3GlcNAc $\beta$ -sp3       | Le <sup>c</sup> 3Le <sup>c</sup> | Le <sup>c</sup> 3Le <sup>c</sup> | 805.8 |
| 419 | 3-O-SuGal $\beta$ 1-4GlcNAc $\beta$ 1-3Gal $\beta$ 1-4GlcNAc $\beta$ -sp3 |                                  | (3`SuLN)<br>3`LN                 | 907.8 |
| 420 | 4-O-SuGal $\beta$ 1-4GlcNAc $\beta$ 1-3Gal $\beta$ 1-4GlcNAc $\beta$ -sp3 |                                  | (4`SuLN)<br>3`LN                 | 907.8 |

|                               |                                                                                               |                      |                                        |                           |
|-------------------------------|-----------------------------------------------------------------------------------------------|----------------------|----------------------------------------|---------------------------|
| 421                           | Neu5Ac $\alpha$ 2-3(GalNAc $\beta$ 1-4)Gal $\beta$ 1-4Glc $\beta$ -sp2                        | GM2                  | GM2                                    | 879.8                     |
| 422                           | Neu5Ac $\alpha$ 2-3Gal $\beta$ 1-4GlcNAc $\beta$ 1-3Gal $\beta$ -sp3                          |                      | 3' SLNb3A                              | 893.9                     |
| 423                           | Fuca1-3(Neu5Ac $\alpha$ 2-3Gal $\beta$ 1-4)GlcNAc $\beta$ -sp3                                | SiaLe <sup>x</sup>   | SiaLeX                                 | 877.9                     |
| 426                           | Neu5Ac $\alpha$ 2-3Gal $\beta$ 1-3(Fuca1-4)GlcNAc $\beta$ -sp3                                | SiaLe <sup>a</sup>   | SiaLeA                                 | 877.9                     |
| 428                           | Fuca1-3(Neu5Ac $\alpha$ 2-3Gal $\beta$ 1-4)6-O-Su-GlcNAc $\beta$ -sp3                         |                      | SiaLeX6Su                              | 979.9                     |
| 429                           | Fuca1-3(Neu5Ac $\alpha$ 2-3(6-O-Su)Gal $\beta$ 1-4)GlcNAc $\beta$ -sp3                        |                      | SiaLeX6 <sup>6</sup> Su                | 979.9                     |
| 433                           | Neu5Ac $\alpha$ 2-3Gal $\beta$ 1-3(Neu5Ac $\alpha$ 2-6)GalNAc $\alpha$ -sp3                   | Sia2-TF              | Sia2-3',6TF                            | 1044.9                    |
| 434                           | Neu5Ac $\alpha$ 2-8Neu5Ac $\alpha$ 2-3Gal $\beta$ 1-4Glc $\beta$ -sp4                         | GD3                  | GC3                                    | 1002.9 (Na <sup>+</sup> ) |
| <b>PENTA-NONA SACCHARIDES</b> |                                                                                               |                      |                                        |                           |
| 479                           | Fuca1-2Gal $\beta$ 1-3GlcNAc $\beta$ 1-3Gal $\beta$ 1-4Glc $\beta$ -sp4                       | LNFP-I               | Htype1Lac                              | 909.9                     |
| 480                           | Fuca1-2Gal $\beta$ 1-3GlcNAc $\beta$ 1-3Gal $\beta$ 1-4GlcNAc $\beta$ -sp2                    | H (type1) penta      | Htype1LN                               | 937.91                    |
| 481                           | Gal $\alpha$ 1-3Gal $\beta$ 1-4GlcNAc $\beta$ 1-3Gal $\beta$ 1-4Glc $\beta$ -sp4              | Galili (penta)       | Galili5                                | 925.8                     |
| 483                           | Fuca1-3(Fuca1-2 (Gal $\alpha$ 1-3)Gal $\beta$ 1-4)GlcNAc $\beta$ -sp3                         | Ble <sup>y</sup>     | BLeY                                   | 894.9                     |
| 488                           | Gal $\beta$ 1-4GlcNAc $\beta$ 1-3(Gal $\beta$ 1-4GlcNAc $\beta$ 1-6)GalNAc $\alpha$ -sp3      |                      | LN2-3,6Tn                              | 1008.9                    |
| 489                           | Gal $\beta$ 1-4GlcNAc $\beta$ 1-3(GlcNAc $\beta$ 1-6)Gal $\beta$ 1-4GlcNAc-sp2                |                      | LN3 <sup>6</sup> (GN6 <sup>6</sup> )LN | 994.9                     |
| 490                           | GlcNAc $\beta$ 1-3(Gal $\beta$ 1-4GlcNAc $\beta$ 1-6)Gal $\beta$ 1-4GlcNAc $\beta$ -sp2       |                      | LN6 <sup>6</sup> (GN3 <sup>6</sup> )LN | 994.9                     |
| 492                           | (Glc $\alpha$ 1-6) <sub>5</sub> $\beta$ -sp4                                                  | isomaltopentaose     | (Ga6)5b                                | 884.8                     |
| 493                           | (GlcNAc $\beta$ 1-4) <sub>5</sub> $\beta$ -sp4                                                | chitopentaose        | Ch5                                    | 1090                      |
| 495                           | Man $\alpha$ 1-3(Man $\alpha$ 1-3(Man $\alpha$ 1-6)Man $\alpha$ 1-6)Man $\beta$ -sp4          | Man5                 | (Ma)5b                                 | 966.9                     |
| 496                           | Fuca1-2Gal $\beta$ 1-3(Fuca1-4)GlcNAc $\beta$ 1-3Gal $\beta$ 1-4Glc $\beta$ -sp4              | Le <sup>b</sup> -Lac | LeBLac                                 | 1056                      |
| 497                           | Fuca1-3(Fuca1-2Gal $\beta$ 1-4)GlcNAc $\beta$ 1-3Gal $\beta$ 1-4Glc $\beta$ -sp4              | Le <sup>y</sup> -Lac | LeYLac                                 | 1056                      |
| 498                           | (Gal $\beta$ 1-4GlcNAc $\beta$ 1-3) <sub>3</sub> -sp3                                         | (LN) <sub>3</sub>    | (LNb3 <sup>6</sup> ) <sub>3</sub>      | 1171.1                    |
| 499                           | Gal $\beta$ 1-4GlcNAc $\beta$ 1-3(Gal $\beta$ 1-4GlcNAc $\beta$ 1-6)Gal $\beta$ 1-4GlcNAc-sp2 | I                    | LN2-3',6LN                             | 1157.1                    |

|                               |                                                                   |                          |             |                            |
|-------------------------------|-------------------------------------------------------------------|--------------------------|-------------|----------------------------|
| 501                           | Galβ1-3GalNAcβ1-3Galα1-4Galβ1-4Glcβ-sp4                           | Gb5                      | Gb5         | 925.8                      |
| 502                           | (Glcα1-6)β-sp4                                                    | maltohexaose             | (Ga6)6b     | 1046.9                     |
| 503                           | (GlcNAcβ1-4)β-sp4                                                 | chitohexaose             | Ch6         | 1293.3                     |
| 504                           | (A-GN-M) <sub>2</sub> -3,6-M-GN-GNβ-sp4                           | 9-OS                     | 9-OS        | 1697.6                     |
| 505                           | (GN-M) <sub>2</sub> -3,6-M-GN-GNβ-sp4                             | 7-OS                     | 7-OS        | 1373.3                     |
| 527                           | Neu5Acα2-3Galβ1-4GlcNAcβ1-3Galβ1-4GlcNAcβ-sp2                     | 3`SLN-LacNAc             | 3`SLN-LN    | 1083                       |
| 528                           | Fucα1-3(Neu5Acα2-3Galβ1-4)GlcNAcβ1-3Galβ-sp3                      | SiaLe <sup>x</sup> -3Gal | SiaLeX3A    | 1040                       |
| 529                           | Neu5Acα2-6(Galβ1-3)GlcNAcβ1-3Galβ1-4Glcβ-sp4                      | LSTb                     | LSTb        | 1055                       |
| 531                           | GalNAcβ1-4(Neu5Acα2-8Neu5Acα2-3)Galβ1-4Glc-sp2                    | GD2                      | GD2-C2      | 1193.1 (Na <sup>+</sup> )  |
| 532                           | Neu5Acα2-8Neu5Acα2-8Neu5Acα2-3Galβ1-4Glc-sp2                      | GT3                      | GT3         | 1303.1 (2Na <sup>+</sup> ) |
| 533                           | (Neu5Acα2-8) <sub>2</sub> Neu5Acα2-3(GalNAcβ1-4)Galβ1-4Glc-sp2    | GT2                      | GT2         | 1506.3 (2Na <sup>+</sup> ) |
| 534                           | Neu5Acα2-3Galβ1-4GlcNAcβ1-3Galβ1-4GlcNAcβ-sp3                     | 6`SLN-LacNAc             | 6`SLN-LN    | 1097.1                     |
| 536                           | Neu5Acα2-3Galβ1-3GlcNAcβ1-3Galβ1-4Glcβ-sp4                        | LSTa                     | LSTa        | 1055                       |
| 537                           | Neu5Acα2-3Galβ1-4GlcNAcβ1-3Galβ1-4Glcβ-sp4                        | LSTd                     | LSTd        | 1055                       |
| 538                           | Le <sup>x</sup> 1-6'(Le <sup>c</sup> 1-3')Lac-sp4                 | MFLNH III                | MFLNH III   | 1389.2                     |
| 539                           | LacNAc1-6'(Le <sup>d</sup> 1-3')Lac-sp4                           | MFLNH I                  | MFLNH I     | 1389.2                     |
| 540                           | Le <sup>x</sup> 1-6'(6'SLN1-3')Lac-sp4                            | MSMFLNnH                 | MSMFLNnH    | 1566.5                     |
| 541                           | Le <sup>x</sup> 1-6'(Le <sup>d</sup> 1-3')Lac-sp4                 | DFLNH (a)                | DFLNH (a)   | 1535.4                     |
| 542                           | Le <sup>c</sup> Le <sup>x</sup> 1-6'(Le <sup>c</sup> 1-3')Lac-sp4 | MF(1-3)iLNO              | MF(1-3)iLNO | 1754.6                     |
| 543                           | Le <sup>x</sup> 1-6'(Le <sup>b</sup> 1-3')Lac-sp4                 | TFLNH                    | TFLNH       | 1681.5                     |
| <b>HIGER OLIGOSACCHARIDES</b> |                                                                   |                          |             |                            |
| 625                           | (GlcAβ1-4GlcNAcβ1-3) <sub>8</sub> -NH <sub>2</sub> -ol            | hyaluroninc acid         | HyalU-ol    | 3207.5                     |
| 627                           | (Sia2-6A-GN-M) <sub>2</sub> -3,6-M-GN-GNβ-sp4                     | 11-OS, YDS               | 11-OS       | 2302.1 (Na <sup>+</sup> )  |



| TERMINAL GALACTOSE |                                                                                                                         |                                                         |  |         |
|--------------------|-------------------------------------------------------------------------------------------------------------------------|---------------------------------------------------------|--|---------|
| 1A                 | Gal $\beta$ 1-3GlcNAc                                                                                                   | Lacto-N-Biose I                                         |  | 383.35  |
| 1B                 | Gal $\beta$ 1-4GlcNAc                                                                                                   | N-Acetylglucosamine                                     |  | 383.35  |
| 1C                 | Gal $\beta$ 1-4Gal                                                                                                      | $\beta$ -1-4-galactosyl-galactose                       |  | 342.3   |
| 1D                 | Gal $\beta$ 1-6GlcNAc                                                                                                   | $\beta$ -1-6 Galactosyl-N-acetyl glucosamine            |  | 383.35  |
| 1E                 | Gal $\beta$ 1-3GalNAc                                                                                                   | $\beta$ -1-3 Galactosyl-N-acetyl galactosamine          |  | 383.35  |
| 1F                 | Gal $\beta$ 1-3GalNAc $\beta$ 1-4Gal $\beta$ 1-4Glc                                                                     | asialo GM1                                              |  | 707.63  |
| 1G                 | Gal $\beta$ 1-3GlcNAc $\beta$ 1-3Gal $\beta$ 1-4Glc                                                                     | Lacto-N-tetraose                                        |  | 707.63  |
| 1H                 | Gal $\beta$ 1-4GlcNAc $\beta$ 1-3Gal $\beta$ 1-4Glc                                                                     | Lacto-N-neotetraose                                     |  | 707.63  |
| 1I                 | Gal $\beta$ 1-4GlcNAc $\beta$ 1-6(Gal $\beta$ 1-4GlcNAc $\beta$ 1-3)Gal $\beta$ 1-4Glc                                  | Lacto-N-neohexaose                                      |  | 1072.96 |
| 1J                 | Gal $\beta$ 1-4GlcNAc $\beta$ 1-6(Gal $\beta$ 1-3GlcNAc $\beta$ 1-3)Gal $\beta$ 1-4Glc                                  | Lacto-N-hexaose                                         |  | 1072.96 |
| 1K                 | Gal $\alpha$ 1-4Gal $\beta$ 1-4Glc                                                                                      | Globotriose                                             |  | 504.44  |
| 1L                 | GalNAc $\alpha$ 1-O-Ser                                                                                                 | Tn Antigen GalNAc $\alpha$ 1-O-Ser                      |  | 308.29  |
| 1M                 | Gal $\beta$ 1-3GalNAc $\alpha$ 1-O-Ser                                                                                  | Galactosyl-Tn Antigen                                   |  | 470.43  |
| 1N                 | Gal $\alpha$ 1-3Gal                                                                                                     | $\alpha$ 1-3 Galactobiose                               |  | 342.24  |
| 1O                 | Gal $\alpha$ 1-3Gal $\beta$ 1-4GlcNAc                                                                                   | Linear B-2 Trisaccharide                                |  | 545.49  |
| 1P                 | Gal $\alpha$ 1-3Gal $\beta$ 1-4Glc                                                                                      | Linear B-6 Trisaccharide                                |  | 504.44  |
| 2A                 | Gal $\alpha$ 1-3Gal $\beta$ 1-4Gal $\alpha$ 1-3Gal                                                                      | $\alpha$ 1-3, $\beta$ 1-4, $\alpha$ 1-3 Galactotetraose |  | 666.58  |
| 2B                 | Gal $\beta$ 1-6Gal                                                                                                      | beta1-6galactobiose                                     |  | 342.3   |
| 2C                 | GalNAc $\beta$ 1-3Gal                                                                                                   | terminal disaccharide of Globotriose                    |  | 383.35  |
| 2D                 | GalNAc $\beta$ 1-4Gal                                                                                                   | receptor for P.aureginosa                               |  | 383.35  |
| 2E                 | Gal $\alpha$ 1-4Gal $\beta$ 1-4GlcNAc                                                                                   | P1 antigen                                              |  | 545.49  |
| 2F                 | GalNAc $\alpha$ 1-3Gal $\beta$ 1-4Glc                                                                                   | a-D-N-acetylgalactosamine 1-3Gal $\beta$ 1-4Glc         |  | 545.49  |
| 2G                 | Gal $\beta$ 1-3GlcNAc $\beta$ 1-3Gal $\beta$ 1-4GlcNAc $\beta$ 1-6(Gal $\beta$ 1-3GlcNAc $\beta$ 1-3)Gal $\beta$ 1-4Glc | iso-Lacto-N-octaose (iLNO)                              |  | 1438.3  |
| 2H                 | Gal $\beta$ 1-3GlcNAc $\beta$ 1-3Gal $\beta$ 1-4GlcNAc $\beta$ 1-3Gal $\beta$ 1-4Glc                                    | para-Lacto-N-hexaose (pLNH)                             |  | 1072.96 |
| 18B                | Gal $\beta$ 1-3GalNAc $\beta$ 1-3Gal $\alpha$ 1-4Gal $\beta$ 1-4Glc                                                     | Globopentaose                                           |  | 869.76  |

|                                    |                                                                                                          |                                                            |  |         |
|------------------------------------|----------------------------------------------------------------------------------------------------------|------------------------------------------------------------|--|---------|
| 18C                                | Gal $\beta$ 1-3GalNAc $\beta$ 1-3Gal                                                                     | Core type 4/Gb5<br>triose structure                        |  | 545.48  |
| 18L                                | Gal $\beta$ 1-4Glc                                                                                       | 4-O-(B-D-<br>galactopyranosyl)-<br>B-D-glucose             |  | 342.3   |
| 18M                                | Gal $\beta$ 1-4Gal                                                                                       | 4-O-(B-D-galactopyranosyl)-B-<br>D-galactose               |  | 360.3   |
| 18N                                | Gal $\beta$ 1-6Gal                                                                                       | 6-O-(B-D-galactopyranosyl)-B-<br>D-galactose               |  | 342.3   |
| <b>TERMINAL GlcNAc</b>             |                                                                                                          |                                                            |  |         |
| 4A                                 | GlcNAc $\beta$ 1-4GlcNAc                                                                                 | N,N'-Diacyetyl<br>chitobiose                               |  | 424.4   |
| 4B                                 | GlcNAc $\beta$ 1-4GlcNAc $\beta$ 1-<br>4GlcNAc                                                           | N,N',N''-Triacetyl chitotriose                             |  | 627.59  |
| 4C                                 | GlcNAc $\beta$ 1-4GlcNAc $\beta$ 1-<br>4GlcNAc $\beta$ 1-4GlcNAc                                         | N,N',N'',N'''-Tetraacetyl<br>chitotetraose                 |  | 830.79  |
| 4D                                 | GlcNAc $\beta$ 1-4GlcNAc $\beta$ 1-<br>4GlcNAc $\beta$ 1-4GlcNAc $\beta$ 1-<br>4GlcNAc $\beta$ 1-4GlcNAc | N,N',N'',N''',N''''-Hexaacetyl<br>chitohexaose             |  | 1237.17 |
| 4E                                 | Bacterial cell wall muramyl<br>discaccharide                                                             | GlcNAc $\beta$ 1-<br>4MurNAc                               |  | 496.46  |
| 4F                                 | GlcNAc $\beta$ 1-4GlcNAc $\beta$ 1-<br>4GlcNAc $\beta$ 1-4GlcNAc $\beta$ 1-<br>4GlcNAc                   | Pentacetyl<br>chitopentaose                                |  | 1033.98 |
| 18G                                | 6-O-Su-GlcNAc                                                                                            | N-Acetyl-D-Glucosamine 6-O-<br>sulfate                     |  | 323.25  |
| 18H                                | GlcNAc                                                                                                   | N-Acetyl-D-<br>Glucosamine                                 |  | 221.21  |
| <b>MANNOSYL CONTAINING GLYCANS</b> |                                                                                                          |                                                            |  |         |
| 5A                                 | GlcNAc $\beta$ 1-2Man                                                                                    | $\beta$ 1-2 N-<br>Acetylglucosamine-<br>mannose            |  | 383.35  |
| 5B                                 | GlcNAc $\beta$ 1-2Man $\alpha$ 1-<br>6(GlcNAc $\beta$ 1-2Man $\alpha$ 1-3)Man                            | Biantennary N-linked core<br>pentasaccharide               |  | 910.8   |
| 5C                                 | Man $\alpha$ 1-2Man                                                                                      | $\alpha$ 1-2-Mannobiose                                    |  | 342.3   |
| 5D                                 | Man $\alpha$ 1-3Man                                                                                      | $\alpha$ 1-3-Mannobiose                                    |  | 342.3   |
| 5E                                 | Man $\alpha$ 1-4Man                                                                                      | $\alpha$ 1-4-Mannobiose                                    |  | 342.3   |
| 5F                                 | Man $\alpha$ 1-6Man                                                                                      | $\alpha$ 1-6-Mannobiose                                    |  | 342.3   |
| 5G                                 | Man $\alpha$ 1-6(Man $\alpha$ 1-3)Man                                                                    | $\alpha$ 1-3, $\alpha$ 1-6-<br>Mannobiose                  |  | 504.44  |
| 5H                                 | Man $\alpha$ 1-6(Man $\alpha$ 1-3)Man $\alpha$ 1-<br>6(Man $\alpha$ 1-3)Man                              | $\alpha$ 1-3, $\alpha$ 1-3, $\alpha$ 1-6-<br>Mannopentaose |  | 828.72  |
| <b>FUCOSYLATED GLYCANS</b>         |                                                                                                          |                                                            |  |         |
| 7A                                 | Fuc $\alpha$ 1-2Gal $\beta$ 1-3GlcNAc $\beta$ 1-<br>3Gal $\beta$ 1-4Glc                                  | Lacto-N-<br>fucopentaose I                                 |  | 853.77  |
| 7B                                 | Gal $\beta$ 1-3(Fuc $\alpha$ 1-4)GlcNAc $\beta$ 1-<br>3Gal $\beta$ 1-4Glc                                | Lacto-N-<br>fucopentaose II                                |  | 853.77  |

|    |                                                                                                                 |                                           |  |         |
|----|-----------------------------------------------------------------------------------------------------------------|-------------------------------------------|--|---------|
| 7C | Gal $\beta$ 1-4(Fuca1-3)GlcNAc $\beta$ 1-3Gal $\beta$ 1-4Glc                                                    | Lacto-N-fucopentaose III                  |  | 853.77  |
| 7D | Fuca1-2Gal $\beta$ 1-3(Fuca1-4)GlcNAc $\beta$ 1-3Gal $\beta$ 1-4Glc                                             | Lacto-N-difucohexaose I                   |  | 999.91  |
| 7E | Gal $\beta$ 1-3(Fuca1-4)GlcNAc $\beta$ 1-3Gal $\beta$ 1-4(Fuca1-3)Glc                                           | Lacto-N-difucohexaose II                  |  | 999.91  |
| 7F | Fuca1-2Gal                                                                                                      | H-disaccharide                            |  | 326.3   |
| 7G | Fuca1-2Gal $\beta$ 1-4Glc                                                                                       | 2'-Fucosyllactose                         |  | 488.44  |
| 7H | Gal $\beta$ 1-4(Fuca1-3)Glc                                                                                     | 3'-Fucosyllactose                         |  | 488.44  |
| 7I | Gal $\beta$ 1-4(Fuca1-3)GlcNAc                                                                                  | Lewis <sup>x</sup>                        |  | 529.49  |
| 7J | Gal $\beta$ 1-3(Fuca1-4)GlcNAc                                                                                  | Lewis <sup>a</sup>                        |  | 529.49  |
| 7K | GalNAc $\alpha$ 1-3(Fuca1-2)Gal                                                                                 | Blood Group A trisaccharide               |  | 529.49  |
| 7L | Fuca1-2Gal $\beta$ 1-4(Fuca1-3)Glc                                                                              | Lactodifucotetraose (LDFT)                |  |         |
| 7M | Gal $\beta$ 1-3(Fuca1-2)Gal                                                                                     | Blood Group B Trisaccharide               |  | 488.44  |
| 7N | Fuca1-2Gal $\beta$ 1-4(Fuca1-3)GlcNAc                                                                           | Lewis <sup>y</sup>                        |  | 675.63  |
| 7O | Fuca1-2Gal $\beta$ 1-3GlcNAc                                                                                    | Blood Group H Type II Trisaccharide       |  | 529.49  |
| 7P | Fuca1-2Gal $\beta$ 1-3(Fuca1-4)GlcNAc                                                                           | Lewis <sup>b</sup> tetrasaccharide        |  | 675.63  |
| 8A | SO <sub>3</sub> -3Gal $\beta$ 1-3(Fuca1-4)GlcNAc                                                                | Sulpho Lewis <sup>a</sup>                 |  | 631.53  |
| 8B | SO <sub>3</sub> -3Gal $\beta$ 1-4(Fuca1-3)GlcNAc                                                                | Sulpho Lewis <sup>x</sup>                 |  | 631.53  |
| 8C | Gal $\beta$ 1-3GlcNAc $\beta$ 1-3Gal $\beta$ 1-4(Fuca1-3)GlcNAc $\beta$ 1-3Gal $\beta$ 1-4Glc                   | Monofucosyl-para-Lacto-N-hexaose IV       |  | 1219.1  |
| 8D | Gal $\beta$ 1-4(Fuca1-3)GlcNAc $\beta$ 1-6(Gal $\beta$ 1-3GlcNAc $\beta$ 1-3)Gal $\beta$ 1-4Glc                 | Monofucosyllacto-N-hexaose III            |  | 1219.1  |
| 8E | Gal $\beta$ 1-4(Fuca1-3)GlcNAc $\beta$ 1-6(Fuca1-2Gal $\beta$ 1-3GlcNAc $\beta$ 1-3)Gal $\beta$ 1-4Glc          | Difucosyllacto-N-hexaose                  |  | 1365.25 |
| 8F | Gal $\beta$ 1-4(Fuca1-3)GlcNAc $\beta$ 1-6(Fuca1-2Gal $\beta$ 1-3(Fuca1-4)GlcNAc $\beta$ 1-3)Gal $\beta$ 1-4Glc | Trifucosyllacto-N-hexaose                 |  | 1511.39 |
| 8G | Gal $\beta$ 1-4GlcNAc $\beta$ 1-3Gal $\beta$ 1-4(Fuca1-3)Glc                                                    | Lacto-N-fucopentaose VI (LNFP VI)         |  | 853.77  |
| 8H | Fuca1-2Gal $\beta$ 1-4(Fuca1-3)GlcNAc $\beta$ 1-3Gal $\beta$ 1-4Glc                                             | Lacto-N-neodifucohexaose I (LNnDFH I)     |  | 999.91  |
| 8I | Fuca1-3Gal $\beta$ 1-4GlcNAc $\beta$ 1-3Gal $\beta$ 1-4(Fuca1-3)Glc                                             | Lacto-N-neodifucohexaose II (LNnDFH II)   |  | 999.91  |
| 8J | Fuca1-2Gal $\beta$ 1-4(Fuca1-3)GlcNAc $\beta$ 1-3(Fuca1-2)Gal $\beta$ 1-4Glc                                    | Trifucosyllacto-N-neotetraose I (TFLNnTI) |  | 1146.05 |

|                           |                                                                                                                                         |                                                                    |         |
|---------------------------|-----------------------------------------------------------------------------------------------------------------------------------------|--------------------------------------------------------------------|---------|
| 8K                        | Gal $\beta$ 1-4(Fuca1-3)GlcNAc $\beta$ 1-6(Gal $\beta$ 1-4GlcNAc $\beta$ 1-3)Gal $\beta$ 1-4Glc                                         | Monofucosyllacto- N-neohexaose I (MFLNnH I)                        | 1219.1  |
| 8L                        | Gal $\beta$ 1-4(Fuca1-3)GlcNAc $\beta$ 1-6(Gal $\beta$ 1-4(Fuca1-3)GlcNAc $\beta$ 1-3)Gal $\beta$ 1-4Glc                                | Difucosyllacto-N-neohexaose I (DFLNnH I)                           | 1365.25 |
| 8M                        | Fuca1-2Gal $\beta$ 1-4(Fuca1-3)GlcNAc $\beta$ 1-6(Gal $\beta$ 1-4GlcNAc $\beta$ 1-3)Gal $\beta$ 1-4Glc                                  | Difucosyllacto-N-neohexaose II (DFLNnH II)                         | 1365.25 |
| 8N                        | Gal $\beta$ 1-3GlcNAc $\beta$ 1-3Gal $\beta$ 1-4(Fuca1-3)GlcNAc $\beta$ 1-6(Gal $\beta$ 1-3GlcNAc $\beta$ 1-3)Gal $\beta$ 1-4Glc        | Monofucosyl(1-3)-iso-lacto-N-octaose (MFiLNO)                      | 1584.44 |
| 8O                        | Fuca1-2Gal $\beta$ 1-3GlcNAc $\beta$ 1-3Gal $\beta$ 1-4(Fuca1-3)GlcNAc $\beta$ 1-6(Gal $\beta$ 1-3GlcNAc $\beta$ 1-3)Gal $\beta$ 1-4Glc | Trifucosyl(1-2,1-2,1-3)-iso-lacto-N-octaose (TFiLNO (1-2,1-2,1-3)) | 1876.72 |
| 8P                        | GalNAc $\alpha$ 1-3(Fuca1-2)Gal $\beta$ 1-4GalNAc                                                                                       | Blood Group A tetrasaccharide                                      | 732.68  |
| 9A                        | Gala1-3(Fuca1-2)Gal $\beta$ 1-4(Fuca1-3)Glc                                                                                             | Blood Group B pentasaccharide                                      | 796.72  |
| 9B                        | Gal $\beta$ 1-4GlcNAc $\beta$ 1-6(Fuca1-2Gal $\beta$ 1-3GlcNAc $\beta$ 1-3)Gal $\beta$ 1-4Glc                                           | Monofucosyllacto-N-hexaose I                                       | 1219.1  |
| 18D                       | Gala1-3(Fuca1-2)Gal $\beta$ 1-4Glc                                                                                                      | Blood group B antigen tetraose type 5                              | 650.57  |
| 18E                       | GalNAc $\alpha$ 1-3(Fuca1-2)Gal $\beta$ 1-4(Fuca1-3)Glc                                                                                 | Blood group A pentasaccharide                                      | 837.77  |
| 19J                       | Gal $\beta$ 1-4(Fuca1-3)GlcNAc $\beta$ 1-3Gal                                                                                           | Lewis <sup>x</sup> tetraose                                        | 691.62  |
| 19L                       | Fuca1-2Gal $\beta$ 1-4(Fuca1-3)GlcNAc $\beta$ 1-3Gal                                                                                    | Lewis <sup>y</sup> pentaose                                        | 837.77  |
| 19M                       | Gal $\beta$ 1-3(Fuca1-4)GlcNAc $\beta$ 1-3Gal                                                                                           | Lewis <sup>a</sup> tetraose                                        | 691.62  |
| 19N                       | Fuca1-2Gal $\beta$ 1-3(Fuca1-4)GlcNAc $\beta$ 1-3Gal                                                                                    | Lewis <sup>b</sup> pentaose                                        | 837.77  |
| 20A                       | Fuca1-2Gal $\beta$ 1-3GalNAc $\beta$ 1-3Gal                                                                                             | Blood group H antigen tetraose type 4                              | 691.27  |
| 20B                       | GalNAc $\alpha$ 1-3(Fuca1-2)Gal $\beta$ 1-3GalNAc $\beta$ 1-3Gal                                                                        | Blood group A antigen pentaose type 4                              | 894.82  |
| 20C                       | Gala1-3(Fuca1-2)Gal $\beta$ 1-3GalNAc $\beta$ 1-3Gal                                                                                    | Blood group B antigen pentasaccharide type 4                       | 853.76  |
| <b>SIALYLATED GLYCANS</b> |                                                                                                                                         |                                                                    |         |
| 10A                       | Neu5Ac $\alpha$ 2-3Gal $\beta$ 1-3(Fuca1-4)GlcNAc                                                                                       | Sialyl Lewis <sup>a</sup> (SLea)                                   | 820.74  |
| 10B                       | Neu5Ac $\alpha$ 2-3Gal $\beta$ 1-4(Fuca1-3)GlcNAc                                                                                       | Sialyl Lewis <sup>x</sup> (SLe <sup>x</sup> )                      | 820.74  |
| 10C                       | Neu5Ac $\alpha$ 2-3Gal $\beta$ 1-3GlcNAc $\beta$ 1-3Gal $\beta$ 1-4Glc                                                                  | Sialyllacto-N-tetraose a                                           |         |

|                                                           |                                                                                                                    |                                                                                                                                                   |         |
|-----------------------------------------------------------|--------------------------------------------------------------------------------------------------------------------|---------------------------------------------------------------------------------------------------------------------------------------------------|---------|
| 10D                                                       | Gal $\beta$ 1-4(Fuca1-3)GlcNAc $\beta$ 1-6(Neu5Ac $\alpha$ 2-6Gal $\beta$ 1-4GlcNAc $\beta$ 1-3)Gal $\beta$ 1-4Glc | Monosialyl, monofucosyllacto-N-neohexose                                                                                                          | 1510.36 |
| 10E                                                       | Neu5Ac $\alpha$ 2-3Gal $\beta$ 1-3(Neu5Ac $\alpha$ 2-6)GalNAc                                                      | Disialyl-TF                                                                                                                                       | 965.86  |
| 10H                                                       | Neu5Ac $\alpha$ 2-6Gal $\beta$ 1-3GlcNAc $\beta$ 1-3Gal $\beta$ 1-4(Fuca1-3)Glc                                    | Sialyllacto-N-fucopentaose VI                                                                                                                     | 1145.03 |
| 10I                                                       | Gal $\beta$ 1-3GlcNAc $\beta$ 1-3(Neu5Ac $\alpha$ 2-6Gal $\beta$ 1-4GlcNAc $\beta$ 1-6)Gal $\beta$ 1-4Glc          | Monosialyllacto-N-hexaose                                                                                                                         | 1364.22 |
| 10J                                                       | Neu5Ac $\alpha$ 2-6Gal $\beta$ 1-3GlcNAc $\beta$ 1-3(Gal $\beta$ 1-4GlcNAc $\beta$ 1-6)Gal $\beta$ 1-4Glc          | Monosialyllacto-N-neohexaose                                                                                                                      | 1364.22 |
| 10K                                                       | Neu5Ac $\alpha$ 2-3Gal $\beta$ 1-4GlcNAc                                                                           | 3'-Sialyllactosamine                                                                                                                              | 674.6   |
| 10L                                                       | Neu5Ac $\alpha$ 2-6Gal $\beta$ 1-4GlcNAc                                                                           | 6'-Sialyllactosamine                                                                                                                              | 674.6   |
| 10M                                                       | Neu5Ac $\alpha$ 2-3Gal $\beta$ 1-3GlcNAc $\beta$ 1-3Gal $\beta$ 1-4Glc                                             | LS-Tetrasaccharide a (LSTa)                                                                                                                       | 998.88  |
| 10N                                                       | Gal $\beta$ 1-3(Neu5Ac $\alpha$ 2-6)GlcNAc $\beta$ 1-3Gal $\beta$ 1-4Glc                                           | LS-Tetrasaccharide b (LSTb)                                                                                                                       | 998.88  |
| 10O                                                       | Neu5Ac $\alpha$ 2-6Gal $\beta$ 1-4GlcNAc $\beta$ 1-3Gal $\beta$ 1-4Glc                                             | LS-Tetrasaccharide c (LSTc)                                                                                                                       | 998.88  |
| 10P                                                       | Neu5Ac $\alpha$ 2-3Gal $\beta$ 1-3(Neu5Ac $\alpha$ 2-6)GlcNAc $\beta$ 1-3Gal $\beta$ 1-4Glc                        | Disialyllacto-N-tetraose                                                                                                                          | 1290.14 |
| 11A                                                       | Neu5Ac $\alpha$ 2-3Gal $\beta$ 1-4Glc                                                                              | 3'-Sialyllactose                                                                                                                                  | 633.55  |
| 11B                                                       | Neu5Ac $\alpha$ 2-6Gal $\beta$ 1-4Glc                                                                              | 6'-Sialyllactose                                                                                                                                  | 633.55  |
| 11C                                                       | (Neu5Ac $\alpha$ 2-8Neu5Ac) <sub>n</sub> (n<50)                                                                    | Colominic acid                                                                                                                                    |         |
| 18A                                                       | Neu5Ac $\alpha$ 2-3Gal $\beta$ 1-4GlcNAc $\beta$ 1-3Gal $\beta$ 1-4Glc                                             | LS-Tetrasaccharide d                                                                                                                              | 1020.86 |
| 18K                                                       | 9-NAc-Neu5Ac                                                                                                       | 9-acetamido-9-deoxy-N-acetyl-a-D-neurminic acid                                                                                                   | 351.31  |
| 18O                                                       | Neu5Gc                                                                                                             | N-glycolylneuraminic acid                                                                                                                         | 325.27  |
| 19K                                                       | Neu5Ac $\alpha$ 2-3Gal $\beta$ 1-4(Fuca1-3)GlcNAc $\beta$ 1-3Gal                                                   | Sialyl lewis X pentaose                                                                                                                           | 1004.86 |
| <b>GLYCOSAMINOGLYCANS - high and low molecular weight</b> |                                                                                                                    |                                                                                                                                                   |         |
| 12A                                                       | Neocarratetraose-41, 3-di-O-sulphate (Na <sup>+</sup> )                                                            | C <sub>24</sub> H <sub>36</sub> O <sub>25</sub> S <sub>2</sub> Na <sub>2</sub> (Mixed anomers. Tetrasaccharide of regular $\kappa$ - carrageenan) | 834.64  |
| 12B                                                       | Neocarratetraose-41-O-sulphate (Na <sup>+</sup> )                                                                  | C <sub>24</sub> H <sub>37</sub> O <sub>22</sub> SNa (Mixed anomers. Derived from C1003 by removal of the non-reducing terminal 4-sulphate)        | 732.59  |

|     |                                                                    |                                                                                                                                                                                                                                       |         |
|-----|--------------------------------------------------------------------|---------------------------------------------------------------------------------------------------------------------------------------------------------------------------------------------------------------------------------------|---------|
| 12C | Neocarrahexaose-24,41, 3, 5-tetra-O-sulphate (Na <sup>+</sup> )    | C <sub>36</sub> H <sub>52</sub> O <sub>40</sub> S <sub>4</sub> Na <sub>4</sub> (Mixed anomers. A hybrid sequence comprising carrageenan disaccharides in the order k-i-k, derived from the carrageenan from <i>Chondrus crispus</i> ) | 1344.99 |
| 12D | Neocarrahexaose-41, 3, 5-tri-O-sulphate (Na <sup>+</sup> )         | C <sub>36</sub> H <sub>53</sub> O <sub>37</sub> S <sub>3</sub> Na <sub>3</sub> (Mixed anomers. Hexasaccharide of regular κ-carrageenan)                                                                                               | 1242.95 |
| 12E | Neocarraoctaose-41, 3, 5, 7-tetra-O-sulphate (Na <sup>+</sup> )    | C <sub>48</sub> H <sub>70</sub> O <sub>49</sub> S <sub>4</sub> Na <sub>4</sub> (Mixed anomers. Octasaccharide of regular κ-carrageenan)                                                                                               | 1651.26 |
| 12F | Neocarradecaose-41, 3, 5, 7, 9-penta-O-sulphate (Na <sup>+</sup> ) | C <sub>60</sub> H <sub>87</sub> O <sub>61</sub> S <sub>5</sub> Na <sub>5</sub> (Mixed anomers. Decasaccharide of regular κ-carrageenan)                                                                                               | 2059.57 |
| 12G | ΔUA-2S-GlcNS-6S                                                    | C <sub>12</sub> H <sub>15</sub> NO <sub>19</sub> S <sub>3</sub> Na <sub>4</sub> (Predominant disaccharide produced from heparin by heparinase I and II)                                                                               | 665.4   |
| 12H | ΔUA-GlcNS-6S                                                       | C <sub>12</sub> H <sub>16</sub> NO <sub>16</sub> S <sub>2</sub> Na <sub>3</sub> (Produced from heparinase II digestion of heparin and heparin sulphate)                                                                               | 563.35  |
| 12I | ΔUA-2S-GlcNS                                                       | C <sub>12</sub> H <sub>16</sub> NO <sub>16</sub> S <sub>2</sub> Na <sub>3</sub> (Produced from heparin by digestion with heparinase I and II)                                                                                         | 563.35  |
| 12J | ΔUA-2S-GlcNAc-6S                                                   | C <sub>14</sub> H <sub>18</sub> NO <sub>17</sub> S <sub>2</sub> Na <sub>3</sub> (Minor component produced from heparin by heparinase II)                                                                                              | 605.39  |
| 12K | ΔUA-GlcNAc-6S                                                      | C <sub>14</sub> H <sub>19</sub> NO <sub>14</sub> SNa <sub>2</sub> (Product of the action of heparinases II and III on heparin and heparan sulphate)                                                                                   | 503.34  |
| 12L | ΔUA-2S-GlcNAc                                                      | C <sub>14</sub> H <sub>19</sub> NO <sub>14</sub> SNa <sub>2</sub> (Minor product of the action of heparinase II on heparin)                                                                                                           | 503.34  |
| 12M | ΔUA-GlcNAc                                                         | C <sub>14</sub> H <sub>20</sub> NO <sub>11</sub> Na (Produced from heparin sulphate by digestion With heparinase III)                                                                                                                 | 401.3   |
| 12N | ΔUA-GalNAc-4S (Delta Di-4S)                                        | C <sub>14</sub> H <sub>19</sub> NO <sub>14</sub> SNa <sub>2</sub> (Produced from various chondroitin sulphates By the action of chondroitinases ABC, B and AC-1)                                                                      | 503.34  |
| 12O | ΔUA-GalNAc-6S (Delta Di-6S)                                        | C <sub>14</sub> H <sub>19</sub> NO <sub>14</sub> SNa <sub>2</sub> (Produced from various chondroitin sulphates By the action of chondroitinases ABC, AC-1 and C)                                                                      | 503.34  |

|     |                                                                                                 |                                                                                                                                                                                     |        |
|-----|-------------------------------------------------------------------------------------------------|-------------------------------------------------------------------------------------------------------------------------------------------------------------------------------------|--------|
| 12P | $\Delta$ UA-GalNAc-4S,6S (Delta Di-disE)                                                        | $C_{14}H_{18}NO_{17}S_2Na_3$ (Produced from various chondroitin sulphates By the action of chondroitinases ABC, B and AC-1)                                                         | 605.39 |
| 13A | $\Delta$ UA-2S-GalNAc-4S (Delta Di-disB)                                                        | $C_{14}H_{18}NO_{17}S_2Na_3$ (Produced from various chondroitin sulphates by action of chondroitinase ABC and/or B. Most typically from chondroitin sulphate B (dermatan sulphate)) | 605.39 |
| 13B | $\Delta$ UA-2S-GalNAc-6S (Delta Di-disD)                                                        | $C_{14}H_{18}NO_{17}S_2Na_3$ (Produced from various chondroitin sulphates by the action of chondroitinase ABC)                                                                      | 605.39 |
| 13C | $\Delta$ UA-2S-GalNAc-4S-6S (Delta Di-tisS)                                                     | $C_{14}H_{17}NO_{20}S_3Na_4$ (Produced as a minor component by the action of chondroitinase ABC on various chondroitin sulphates, particularly B)                                   | 707.43 |
| 13D | $\Delta$ UA-2S-GalNAc-6S (Delta Di-UA2S)                                                        | $C_{14}H_{19}NO_{14}SNa_2$ (Produced as a minor component from various chondroitin sulphates by the action of chondroitinase ABC)                                                   | 503.34 |
| 13E | $\Delta$ UA-GlcNAc (Delta Di-HA)                                                                | $C_{14}H_{20}NO_{11}Na$ (The only unsaturated disaccharide produced from hyaluronic acid by the action of chondroitinase ABC or AC-1)                                               | 401.3  |
| 13F | (GlcA $\beta$ 1-3GlcNAc $\beta$ 1-4) <sub>n</sub> (n=4)                                         | Hyaluronan fragments (4mer)                                                                                                                                                         |        |
| 13G | (GlcA $\beta$ 1-3GlcNAc $\beta$ 1-4) <sub>n</sub> (n=8)                                         | Hyaluronan fragment (8mer)                                                                                                                                                          |        |
| 13H | (GlcA $\beta$ 1-3GlcNAc $\beta$ 1-4) <sub>n</sub> (n=10)                                        | Hyaluronan fragment (10mer)                                                                                                                                                         |        |
| 13I | (GlcA $\beta$ 1-3GlcNAc $\beta$ 1-4) <sub>n</sub> (n=12)                                        | Hyaluronan fragment (12mer)                                                                                                                                                         |        |
| 13J | (GlcA/IdoA $\alpha$ / $\beta$ 1-4GlcNAc $\alpha$ 1-4) <sub>n</sub> (n=200)                      | Heparin                                                                                                                                                                             |        |
| 13K | (GlcA/IdoA $\beta$ 1-3( $\pm$ 4/6S)GalNAc $\beta$ 1-4) <sub>n</sub> (n<250)                     | Chondroitin sulfate                                                                                                                                                                 |        |
| 13L | (( $\pm$ 2S)GlcA/IdoA $\alpha$ / $\beta$ 1-3( $\pm$ 4S)GalNAc $\beta$ 1-4) <sub>n</sub> (n<250) | Dermatan sulfate                                                                                                                                                                    |        |
| 13M | (GlcA/IdoA $\beta$ 1-3( $\pm$ 6S)GalNAc $\beta$ 1-4) <sub>n</sub> (n<250)                       | Chondroitin 6-sulfate                                                                                                                                                               |        |
| 13N | HA - 4 10mM                                                                                     |                                                                                                                                                                                     | 775    |
| 13O | HA - 6 10mM                                                                                     |                                                                                                                                                                                     | 1155.6 |

|                                    |                                                      |                                                                                                                                                  |  |        |
|------------------------------------|------------------------------------------------------|--------------------------------------------------------------------------------------------------------------------------------------------------|--|--------|
| 13P                                | HA - 8 9.7mM                                         |                                                                                                                                                  |  | 1534.7 |
| 14A                                | HA 10 7.83mM                                         |                                                                                                                                                  |  | 1913.8 |
| 14B                                | HA-12 6.5mM                                          |                                                                                                                                                  |  | 2293.4 |
| 14C                                | HA-14 5.6mM                                          |                                                                                                                                                  |  | 2672.5 |
| 14D                                | HA-16 4.9mM                                          |                                                                                                                                                  |  |        |
| 14E                                | HA 30000 da 2.5mg/ml                                 |                                                                                                                                                  |  |        |
| 14F                                | HA 107000 da 2.5mg/ml                                |                                                                                                                                                  |  |        |
| 14G                                | HA 190000 da 2.5 mg/ml                               |                                                                                                                                                  |  |        |
| 14H                                | HA 220000 da 2.5 mg/ml                               |                                                                                                                                                  |  |        |
| 14I                                | HA 1600000 da 2.5 mg/ml                              |                                                                                                                                                  |  |        |
| 14J                                | Heparin sulfate 5 mg/ml                              |                                                                                                                                                  |  |        |
| 14K                                | $\beta$ 1-3Glucan                                    |                                                                                                                                                  |  |        |
| 14L                                | Chondroitin disaccharide $\Delta$ di-OS, sodium salt | C <sub>14</sub> H <sub>20</sub> NNaO <sub>11</sub> (produced from various chondroitin sulfates by the action of chondroitinases ABC, AC-1 and C) |  | 401.3  |
| 14M                                | $\Delta$ UA $\rightarrow$ 2S-GlcN-6S                 | Heparin unsaturated disaccharide I-H, the major component from the action of heparinase II on de-N-sulfated heparin                              |  | 541.37 |
| 14N                                | $\Delta$ UA $\rightarrow$ GlcN-6S                    | Heparin unsaturated disaccharide II-H, the major component from the action of heparinase II on de-N-sulfated heparin                             |  | 439.32 |
| 14O                                | $\Delta$ UA $\rightarrow$ 2S-GlcN                    | Heparin unsaturated disaccharide III-H, the major component from the action of heparinase II on de-N-sulfated heparin                            |  | 439.32 |
| 14P                                | $\Delta$ UA $\rightarrow$ GlcN                       | Heparin unsaturated disaccharide iV-H is obtained from the action of heparinases on heparin                                                      |  | 337.28 |
| 18I                                | GlcA                                                 | D-Glucuronic acid                                                                                                                                |  | 194.14 |
| <b>TERMINAL GLUCOSE STRUCTURES</b> |                                                      |                                                                                                                                                  |  |        |
| 18J                                | 6-O-(H <sub>2</sub> PO <sub>4</sub> )-Glc            | D-Glucose-6-phosphate                                                                                                                            |  | 260.14 |
| 19O                                | Glc $\alpha$ 1-4Glc $\alpha$ 1-4Glc                  | Maltotriose                                                                                                                                      |  | 504.44 |
| 19P                                | Glc $\alpha$ 1-4Glc $\alpha$ 1-4Glc $\alpha$ 1-4Glc  | Maltotetraose                                                                                                                                    |  | 666.58 |
| <b>GANGLIOSIDE STRUCTURES</b>      |                                                      |                                                                                                                                                  |  |        |
| 17A                                | GalNAc $\beta$ 1-4Gal $\beta$ 1-4Glc                 | asialo GM2                                                                                                                                       |  | 545.48 |
| 17B                                | Gal $\beta$ 1-3GalNAc $\beta$ 1-4Gal $\beta$ 1-4Glc  | asialo GM1                                                                                                                                       |  | 707.62 |



|                               |                                                                                                                                                                                                   |                                                         |         |
|-------------------------------|---------------------------------------------------------------------------------------------------------------------------------------------------------------------------------------------------|---------------------------------------------------------|---------|
| 17C                           | Gal $\beta$ 1-3GalNAc $\beta$ 1-4(Neu5Ac $\alpha$ 2-8Neu5Ac $\alpha$ 2-8Neu5Ac $\alpha$ 2-3)Gal $\beta$ 1-4Glc                                                                                    | GT1c ganglioside sugar                                  | 1647.33 |
| 17D                           | Neu5Ac $\alpha$ 2-8Neu5Ac $\alpha$ 2-3Gal $\beta$ 1-3GalNAc $\beta$ 1-4(Neu5Ac $\alpha$ 2-3)Gal $\beta$ 1-4Glc                                                                                    | GT1a ganglioside sugar                                  | 1647.33 |
| 17E                           | Gal $\beta$ 1-3GalNAc $\beta$ 1-4(Neu5Ac $\alpha$ 2-8Neu5Ac $\alpha$ 2-3)Gal $\beta$ 1-4Glc                                                                                                       | GD1b ganglioside sugar                                  | 1334.09 |
| 17F                           | Neu5Ac $\alpha$ 2-3Gal $\beta$ 1-3GalNAc $\beta$ 1-4(Neu5Ac $\alpha$ 2-3)Gal $\beta$ 1-4Glc                                                                                                       | GD1a Ganglioside sugar                                  | 1334.09 |
| 17G                           | Neu5Ac $\alpha$ 2-3Gal $\beta$ 1-3GalNAc $\beta$ 1-4Gal $\beta$ 1-4Glc                                                                                                                            | GM1b ganglioside sugar                                  | 1020.86 |
| 17H                           | Gal $\beta$ 1-3GalNAc $\beta$ 1-4(Neu5Ac $\alpha$ 2-3)Gal $\beta$ 1-4Glc                                                                                                                          | GM1a ganglioside sugar                                  | 1020.86 |
| 17I                           | Fuc $\alpha$ 1-2Gal $\beta$ 1-3GalNAc $\beta$ 1-4(Neu5Ac $\alpha$ 2-3)Gal $\beta$ 1-4Glc                                                                                                          | fucosyl GM1 ganglioside sugar                           | 1168    |
| 17J                           | GalNAc $\beta$ 1-4(Neu5Ac $\alpha$ 2-8Neu5Ac $\alpha$ 2-8Neu5Ac $\alpha$ 2-3)Gal $\beta$ 1-4Glc                                                                                                   | GT2 ganglioside sugar                                   | 1485.19 |
| 17K                           | GalNAc $\beta$ 1-4(Neu5Ac $\alpha$ 2-8Neu5Ac $\alpha$ 2-3)Gal $\beta$ 1-4Glc                                                                                                                      | GD2 ganglioside sugar                                   | 1171.95 |
| 17L                           | GalNAc $\beta$ 1-4(Neu5Ac $\alpha$ 2-3)Gal $\beta$ 1-4Glc                                                                                                                                         | GM2 ganglioside sugar                                   | 858.72  |
| 17M                           | Neu5Ac $\alpha$ 2-8Neu5Ac $\beta$ 2-8Neu5Ac $\alpha$ 2-3Gal $\beta$ 1-4Glc                                                                                                                        | GT3 ganglioside sugar                                   | 1282    |
| 17N                           | Neu5Ac $\alpha$ 2-8Neu5Ac $\alpha$ 2-3Gal $\beta$ 1-4Glc                                                                                                                                          | GD3 ganglioside sugar                                   | 968.76  |
| 17O                           | Neu5Ac $\alpha$ 2-3Gal $\beta$ 1-4Glc                                                                                                                                                             | GM3 ganglioside sugar                                   | 655.53  |
| 17P                           | Neu5Ac $\alpha$ 2-3Gal $\beta$ 1-3GalNAc $\beta$ 1-4(Neu5Ac $\alpha$ 2-8Neu5Ac $\alpha$ 2-3)Gal $\beta$ 1-4Glc                                                                                    | GT1b ganglioside sugar                                  |         |
| <b>COMPLEX TYPE N-GLYCANS</b> |                                                                                                                                                                                                   |                                                         |         |
| 19A                           | Gal $\beta$ 1-4GlcNAc $\beta$ 1-2Man $\alpha$ 1-3(Gal $\beta$ 1-4GlcNAc $\beta$ 1-2Man $\alpha$ 1-6Man) $\beta$ 1-4GlcNAc $\beta$ 1-4(Fuc $\alpha$ 1-6)GlcNAc                                     | Asialo galactosylated, fucosylated biantennary          | 1787.63 |
| 19B                           | Gal $\beta$ 1-4GlcNAc $\beta$ 1-2(Gal $\beta$ 1-4GlcNAc $\beta$ 1-4)Man $\alpha$ 1-3(Gal $\beta$ 1-4GlcNAc $\beta$ 1-2(Gal $\beta$ 1-4GlcNAc $\beta$ 1-6)Man) $\beta$ 1-4GlcNAc $\beta$ 1-4GlcNAc | Asialo, galactosylated, tetraantennary, N-linked glycan | 2372.15 |
| 19C                           | Neu5Ac $\alpha$ 2-6Gal $\beta$ 1-4GlcNAc $\beta$ 1-2Man $\alpha$ 1-3(Gal $\beta$ 1-4GlcNAc $\beta$ 1-2Man $\alpha$ 1-6)Man $\beta$ 1-4GlcNAc $\beta$ 1-                                           | Monosialo(2,6), biantennary (A1)                        | 1932.74 |

|     |                                                                                                                                                                                                                                         |                                                         |         |
|-----|-----------------------------------------------------------------------------------------------------------------------------------------------------------------------------------------------------------------------------------------|---------------------------------------------------------|---------|
|     | 4GlcNAc                                                                                                                                                                                                                                 |                                                         |         |
| 19D | Neu5Ac $\alpha$ 2-6Gal $\beta$ 1-4GlcNAc $\beta$ 1-2Man $\alpha$ 1-3(Neu5Ac $\alpha$ 2-6Gal $\beta$ 1-4GlcNAc $\beta$ 1-2Man $\alpha$ 1-6)Man $\beta$ 1-4GlcNAc $\beta$ 1-4GlcNAc                                                       | Disialo (2,6) biantennary (A2)                          | 2224    |
| 19E | Gal $\beta$ 1-4GlcNAc $\beta$ 1-2Man $\alpha$ 1-3(Gal $\beta$ 1-4GlcNAc $\beta$ 1-2Man $\alpha$ 1-6)Man $\beta$ 1-4GlcNAc $\beta$ 1-4GlcNAc                                                                                             | Asialo, galactosylated, biantennary (NA2)               | 1641.49 |
| 19F | Neu5Ac $\alpha$ 2-6Gal $\beta$ 1-4GlcNAc $\beta$ 1-2Man $\alpha$ 1-3(Neu5Ac $\alpha$ 2-6Gal $\beta$ 1-4GlcNAc $\beta$ 1-2Man $\alpha$ 1-6)Man $\beta$ 1-4GlcNAc $\beta$ 1-4(Fuca $\alpha$ 1-6)GlcNAc                                    | Disialo, galactosylated, fucosylated, biantennary (A2F) | 2370.14 |
| 19G | Neu5Ac $\alpha$ 2-6Gal $\beta$ 1-4GlcNAc $\beta$ 1-2(Neu5Ac $\alpha$ 2-6Gal $\beta$ 1-4GlcNAc $\beta$ 1-4)Man $\alpha$ 1-3(Neu5Ac $\alpha$ 2-6Gal $\beta$ 1-4GlcNAc $\beta$ 1-2Man $\alpha$ 1-6)Man $\beta$ 1-4GlcNAc $\beta$ 1-4GlcNAc | Trisialylated, galactosylated, triantennary (A3)        | 2880.59 |
| 19H | GlcNAc $\beta$ 1-2(GlcNAc $\beta$ 1-4)Man $\alpha$ 1-3(GlcNAc $\beta$ 1-2Man $\alpha$ 1-6)GlcNAc $\beta$ 1-4Man $\beta$ 1-4GlcNAc $\beta$ 1-4GlcNAc                                                                                     | Asialo, agalacto, bisected triannary (NGA3B)            | 1723.59 |

**Table S3. Molecules included in the small-molecule microarray.**

| <b>Ligands</b>          | <b>Short name</b> | <b>Molecular weight</b> |
|-------------------------|-------------------|-------------------------|
| alanine                 | Ala               | 89.09 g/mol             |
| arginine                | Arg               | 174.2 g/mol             |
| cysteine                | Cys               | 121.16 g/mol            |
| glutamine               | GluA              | 146.14 g/mol            |
| proline                 | Pro               | 115.13 g/mol            |
| tryptophane             | Tryp              | 204.23 g/mol            |
| $\alpha$ -ketoglutarate | a-keto            | 146.11 g/mol            |
| aspartate               | Asp               | 133.11 g/mol            |
| asparagine              | Asn               | 132.12 g/mol            |
| glutamate               | Glu               | 147.13 g/mol            |
| glycine                 | Gly               | 75.07 g/mol             |
| isoleucine              | Iso               | 131.17 g/mol            |
| serine                  | Ser               | 105.09 g/mol            |
| valine                  | Val               | 117.151 g/mol           |
| purine                  | Pur               | 120.11 g/mol            |
| leucine                 | Leu               | 131.17 g/mol            |
| methionine              | Met               | 149.21 g/mol            |
| threonine               | Thr               | 119.1192 g/mol          |
| malic acid              | Malic             | 134.0874 g/mol          |
| glucosamine             | GlucA             | 179.17 g/mol            |
| lysine                  | Lys               | 146.19 g/mol            |
| phenylalanine           | Phe               | 165.19 g/mol            |
| tyrosine                | Try               | 181.19 g/mol            |
| fumarate                | Fum               | 116.07 g/mol            |
| thiamine                | Thia              | 265.355 g/mol           |
| succinate               | Suc               | 118.09 g/mol            |

**Table S4. Complex glycan structures recognized by Tlp10.**

| <b>Number</b>                                             | <b>Spacer form of saccharide</b>                           |
|-----------------------------------------------------------|------------------------------------------------------------|
| <b>MONOSACCHARIDES</b>                                    |                                                            |
| 6                                                         | GalNAc $\beta$ -sp3                                        |
| 22                                                        | GlcNAc $\beta$ -sp4                                        |
| 48                                                        | Neu5Ac $\alpha$ -sp3                                       |
| 20                                                        | Rha $\alpha$ -sp3                                          |
| 3                                                         | Gal $\beta$ -sp3                                           |
| 16                                                        | Man $\alpha$ -sp3                                          |
| 49                                                        | Neu5Ac $\alpha$ -sp9                                       |
| <b>DISACCHARIDES</b>                                      |                                                            |
| 73                                                        | Fuc $\alpha$ 1-4GlcNAc $\beta$ -sp3                        |
| 78                                                        | Gal $\alpha$ 1-3GalNAc $\alpha$ -sp3                       |
| 100                                                       | Gal $\beta$ 1-6Gal $\beta$ -sp4                            |
| 115                                                       | GlcNAc $\beta$ 1-4GlcNAc $\beta$ -Asn                      |
| 168                                                       | GMDP-Lys                                                   |
| 72                                                        | Fuc $\alpha$ 1-3GlcNAc $\beta$ -sp3                        |
| 87                                                        | Gal $\beta$ 1-3Gal $\beta$ -sp3                            |
| 84                                                        | Gal $\beta$ 1-2Gal $\beta$ -sp3                            |
| 93                                                        | Gal $\beta$ 1-4Glc $\beta$ -sp4                            |
| 104                                                       | GalNAc $\beta$ 1-3Gal $\beta$ -sp3                         |
| 120                                                       | Man $\alpha$ 1-3Man $\beta$ -sp4                           |
| 149                                                       | GlcNAc $\beta$ 1-4(6-O-Su)GlcNAc $\beta$ -sp2              |
| 151                                                       | 6-O-Su-Gal $\beta$ 1-3GalNAc $\alpha$ -sp3                 |
| 171                                                       | Neu5Ac $\alpha$ 2-3GalNAc $\alpha$ -sp3                    |
| <b>TRISACCHARIDES</b>                                     |                                                            |
| 233                                                       | Le <sup>a</sup>                                            |
| 293                                                       | Neu5Ac $\alpha$ 2-3Gal $\beta$ 1-4Glc $\beta$ -sp3         |
| 241                                                       | (Glc $\alpha$ 1-6) <sub>3</sub> $\beta$ -sp4               |
| 252                                                       | GlcNAc $\beta$ 1-4GlcNAc $\beta$ 1-4GlcNAc $\beta$ -sp4    |
| 254                                                       | Gal $\beta$ 1-3(GlcNAc $\beta$ 1-6)GalNAc $\alpha$ -sp3    |
| 250                                                       | GlcNAc $\beta$ 1-3Gal $\beta$ 1-4GlcNAc $\beta$ -sp3       |
| <b>Glycosaminoglycans - high and low molecular weight</b> |                                                            |
| 12G                                                       | $\Delta$ UA-2S-GlcNS-6S                                    |
| 12D                                                       | Neocarrahexaose-41, 3, 5-tri-O-sulphate (Na <sup>+</sup> ) |
| 14F                                                       | HA 107000 da 2.5mg/ml                                      |
| <b>Fucosylated glycans</b>                                |                                                            |
| 7E                                                        | Lacto-N-difucohexaose II                                   |
| 19M                                                       | Gal $\beta$ 1-3(Fuc $\alpha$ 1-4)GlcNAc $\beta$ 1-3Gal     |
| <b>Ganglioside structures</b>                             |                                                            |
| 17I                                                       | fucosyl GM1 ganglioside sugar                              |
| 1H                                                        | Lacto-N-neotetraose                                        |
| <b>Mannosyl containing glycans</b>                        |                                                            |
| 5E                                                        | Man $\alpha$ 1-4Man                                        |
| <b>Terminal galactose</b>                                 |                                                            |
| 2G                                                        | iso-Lacto-N-octaose (iLNO)                                 |
| 18N                                                       | Gal $\beta$ 1-6Gal                                         |

**Table S5. Chemotaxis responses of WT and mutant *C. jejuni* strains.** Nutrient depleted chemotaxis assays and  $\mu$ -slide chemotaxis assays. Chemotaxis assays were performed using the indicated ligands as test compounds. The universal attractant mucin was used a positive control. The *C. jejuni* non-motile mutant (81116 $\Delta$ *flaA/flaB*) and PBS were used as negative controls. Data (Log 10 CFU/mL) are from three technical replicates and are representative of three independent experiments ( $n = 3$ ).

| Nutrient-depleted chemotaxis assay |                             |                                      |                                      |                                       |                                       |                                 |                                 |
|------------------------------------|-----------------------------|--------------------------------------|--------------------------------------|---------------------------------------|---------------------------------------|---------------------------------|---------------------------------|
| Ligands                            | <i>C. jejuni</i> 11168-O WT |                                      | $\Delta$ <i>tlp10</i> <sup>LBD</sup> |                                       | $\Delta$ <i>tlp10</i> <sup>LBDc</sup> |                                 | 81116 $\Delta$ <i>flaA/flaB</i> |
|                                    | 2 mM                        | 5 mM                                 | 2 mM                                 | 5 mM                                  | 2 mM                                  | 5 mM                            | 2 mM                            |
| mucin                              | 5.8± 0.56                   | 6.2± 0.68                            | 5.8± 0.76                            | 6± 0.9                                | 5.7± 0.64                             | 5.9± 0.32                       | 0                               |
| arginine                           | 3.6± 0.56                   | 3.1± 0.3                             | 4.6± 0.31                            | 4.9± 0.57                             | 3.4± 0.54                             | 3.8± 0.77                       | 0                               |
| aspartate                          | 5.6± 0.75                   | 5.8± 0.9                             | 3.3± 0.52                            | 3.8± 0.21                             | 4.7± 0.67                             | 5.3± 0.51                       | 0                               |
| isoleucine                         | 5.7± 0.42                   | 6.2± 0.6                             | 3.5± 0.5                             | 4.2± 0.32                             | 4.9± 0.69                             | 5.2± 0.24                       | 0                               |
| thiamine                           | 3.9±0.19                    | 4.1±0.3                              | 4.6±0.24                             | 4.9±0.37                              | 3.8±0.59                              | 3.2±0.16                        | 0                               |
| purine                             | 4.7± 0.67                   | 4.2± 0.1                             | 4.5± 0.66                            | 4.8± 0.28                             | 5.6± 0.75                             | 5.7± 0.36                       | 0                               |
| malate                             | 5.8± 0.51                   | 6.1± 0.42                            | 4.4± 0.45                            | 4.2± 0.19                             | 5.2± 0.72                             | 5.9± 0.24                       | 0                               |
| fumarate                           | 5.7± 0.76                   | 5.5± 0.3                             | 3.6± 0.56                            | 3.9± 0.85                             | 4.2± 0.63                             | 4.8± 0.11                       | 0                               |
| $\alpha$ -ketoglutarate            | 4.7± 0.68                   | 4.9± 0.57                            | 4.3± 0.64                            | 4.2± 0.45                             | 4.7± 0.67                             | 4.8± 0.14                       | 0                               |
| galactose                          | 4.6± 0.45                   | 4.6± 0.2                             | 5.6± 0.25                            | 5.9± 0.17                             | 4.5± 0.55                             | 4.8± 0.11                       | 0                               |
| mannose                            | 3.9± 0.25                   | 3.4± 0.16                            | 3.08±0.33                            | 3.2± 0.28                             | 3.7± 0.59                             | 3.8± 0.25                       | 0                               |
| rhamnose                           | 3.3± 1.07                   | 3.6± 0.49                            | 3.2± 0.28                            | 3.5± 0.39                             | 3.6± 0.08                             | 3.9± 0.27                       | 0                               |
| fucose                             | 5.8± 0.66                   | 5.9± 0.43                            | 3.8± 0.68                            | 3.1± 0.32                             | 4.5± 0.71                             | 5.3± 0.42                       | 0                               |
| PBS                                | 0                           | 0                                    | 0                                    | 0                                     | 0                                     | 0                               | 0                               |
| $\mu$ -slide chemotaxis assay      |                             |                                      |                                      |                                       |                                       |                                 |                                 |
| Ligands                            | <i>C. jejuni</i> 11168-O WT | $\Delta$ <i>tlp10</i> <sup>LBD</sup> |                                      | $\Delta$ <i>tlp10</i> <sup>LBDc</sup> |                                       | 81116 $\Delta$ <i>flaA/flaB</i> |                                 |
| galactose                          | 3.3± 0.16                   | 4.09± 0.34                           |                                      | 3.6± 0.44                             |                                       | 0                               |                                 |
| mannose                            | 3.7± 0.21                   | 3.3± 0.17                            |                                      | 3.4± 0.02                             |                                       | 0                               |                                 |
| rhamnose                           | 3.4± 0.24                   | 3.08± 0.06                           |                                      | 3.5± 0.69                             |                                       | 0                               |                                 |
| fucose                             | 4.9± 0.41                   | 3.6± 0.65                            |                                      | 4.3± 0.28                             |                                       | 0                               |                                 |
| sialic acid                        | 2.3± 0.28                   | 2.7± 0.14                            |                                      | 2.4± 0.05                             |                                       | 0                               |                                 |

\*Log 10 colony-forming units per mL (Log 10 CFU/mL).

**Table S6. Illustration of A-B-A competition SPR analysis of WT Tlp10<sup>LBD</sup>.** The table shows where a cumulative response is observed when a second analyte (B) is flown across the bound protein while the first analyte (A) is present. The experimental value (value determinant) is actual response units (RU) values calculated from competition SPR data. The theoretical value (mathematical prediction) is response units (RU) values based on math theory. For each pair of ligands, binding was categorized as independent, shared, or preferential shared. All response data were normalised to 100Da molecular weight for each analyte, allowing direct comparison of responses. The data represent mean values ( $\pm$ SD ) of three replicates in three independent experiments ( $n = 3$ ).

| Ligand (A)      | Response units (RU $\pm$ SD)     | Ligand (B)      | Response units (RU $\pm$ SD) | Experimental RU (RU B +A $\pm$ SD) | Experimental RU (RU A + B $\pm$ SD) | Theoretical RU (Independent) | Theoretical RU (Shared) | Binding Status (B +A) | Binding Status (A+B) |
|-----------------|----------------------------------|-----------------|------------------------------|------------------------------------|-------------------------------------|------------------------------|-------------------------|-----------------------|----------------------|
| <b>arginine</b> | <b>1.18 <math>\pm</math>0.20</b> |                 |                              |                                    |                                     |                              |                         |                       |                      |
| +               | fumarate                         | 3.07 $\pm$ 0.30 | 2.1 $\pm$ 0.21               | 2.86 $\pm$ 0.26                    | 4.24                                | 2.12                         | Shared                  | Shared                |                      |
| +               | $\alpha$ -ketoglutarate          | 2.16 $\pm$ 0.24 | 1.53 $\pm$ 0.22              | 1.28 $\pm$ 0.23                    | 3.33                                | 1.67                         | Shared                  | Shared                |                      |
| +               | malate                           | 3.26 $\pm$ 0.6  | 4.7 $\pm$ 0.2                | 4.31 $\pm$ 0.2                     | 4.44                                | 2.22                         | Independent             | Independent           |                      |
| +               | isoleucine                       | 2.25 $\pm$ 0.2  | 1.6 $\pm$ 0.1                | 2.19 $\pm$ 0.1                     | 3.43                                | 1.71                         | Shared                  | Shared                |                      |
| +               | thiamine                         | 3.00 $\pm$ 0.1  | 4.39 $\pm$ 0.1               | 2.3 $\pm$ 0.1                      | 4.17                                | 2.09                         | Independent             | Shared                |                      |
| +               | purine                           | 2.41 $\pm$ 0.2  | 2 $\pm$ 0.2                  | 2.62 $\pm$ 0.2                     | 3.58                                | 1.79                         | Shared                  | Shared                |                      |
| +               | aspartate                        | 2.14 $\pm$ 0.2  | 2.25 $\pm$ 0.2               | 2.64 $\pm$ 0.1                     | 3.32                                | 1.66                         | Shared                  | Shared                |                      |
| +               | galactose                        | 1.25 $\pm$ 0.2  | 3.08 $\pm$ 0.1               | 2.96 $\pm$ 0.09                    | 2.43                                | 1.21                         | Independent             | Independent           |                      |
| +               | mannose                          | 1.53 $\pm$ 0.2  | 1.61 $\pm$ 0.1               | 2.23 $\pm$ 0.2                     | 2.7                                 | 1.35                         | Shared                  | Shared                |                      |
| +               | rhamnose                         | 1.68            | 2.1                          | 2.99                               | 2.85                                | 1.43                         | Shared                  | Independent           |                      |

|                    |                            |                         |                     |                 |                 |       |       |                 |                            |
|--------------------|----------------------------|-------------------------|---------------------|-----------------|-----------------|-------|-------|-----------------|----------------------------|
|                    |                            | se                      | ±0.1                | ±0.1            | ±0.1            |       |       |                 | ndent                      |
|                    | +                          | fucose                  | 2.77<br>±0.1        | 2.39<br>±0.1    | 3.81<br>±0.2    | 3.95  | 1.97  | Shared          | Indepe<br>ndent            |
|                    | +                          | Sialic<br>acid          | 0.79<br>±0.02       | 1.22<br>±0.6    | 1.53<br>±0.06   | 1.97  | 0.98  | Shared          | Shared                     |
| <b>mala<br/>te</b> | <b>3.3<br/>±0.65<br/>2</b> |                         |                     |                 |                 |       |       |                 |                            |
|                    | +                          | fumarat<br>e            | 3.06<br>±0.33       | 6.27<br>±0.25   | 5.636<br>±0.28  | 6.330 | 3.165 | Indepe<br>ndent | Shared                     |
|                    | +                          | α-<br>ketoglut<br>arate | 2.2<br>±0.24        | 4.1<br>±0.27    | 4.7<br>±0.16    | 5.4   | 2.709 | Shared          | Shared                     |
|                    | +                          | isoleuci<br>ne          | 2.24±<br>0.21       | 4.562±0.<br>21  | 4.788±0.<br>11  | 5.512 | 2.756 | Shared          | Shared                     |
|                    | +                          | thiamin<br>e            | 2.99<br>±0.13       | 4.381<br>±0.18  | 6.484±0.<br>16  | 6.259 | 3.129 | Shared          | Indepe<br>ndent            |
|                    | +                          | purine                  | 2.406<br>±0.29      | 4.839<br>±0.3   | 5.390<br>±0.27  | 5.669 | 2.834 | Indepe<br>ndent | Indepe<br>ndent            |
|                    | +                          | aspartat<br>e           | 2.141<br>±0.26      | 4.229<br>±0.65  | 3.93<br>±0.5    | 5.404 | 2.702 | Indepe<br>ndent | Shared                     |
|                    | +                          | galactos<br>e           | 1.24<br>±0.19<br>6  | 2.972<br>±0.214 | 4.188<br>±0.039 | 4.512 | 2.256 | Shared          | Prefere<br>ntial<br>Shared |
|                    | +                          | mannos<br>e             | 1.526<br>±0.14<br>1 | 3.787<br>±0.225 | 4.360<br>±0.136 | 4.789 | 2.395 | Shared          | Prefere<br>ntial<br>Shared |
|                    | +                          | rhamno<br>se            | 1.675<br>±0.21      | 4.325<br>±0.15  | 4.526<br>±0.17  | 4.938 | 2.469 | Shared          | Shared                     |
|                    | +                          | fucose                  | 2.772<br>±0.25      | 3.588<br>±0.080 | 4.929<br>±0.188 | 6.034 | 3.017 | Shared          | Shared                     |
|                    | +                          | Sialic<br>acid          | 0.792<br>±0.01      | 2.639<br>±0.018 | 2.471<br>±0.059 | 4.055 | 2.027 | Shared          | Shared                     |

**Table S7. Illustration of A-B-A competition SPR analysis of Tlp10<sup>LBD</sup>Y70A.** The table shows where a cumulative response is observed when a second analyte (B) is flown across the bound protein while the first analyte (A) is present. The experimental value (value determinant) is actual response units (RU) values calculated from competition SPR data. The theoretical value (mathematical prediction) is response units (RU) values based on math theory. For each pair of ligands, binding was categorized as independent, shared, or preferential shared. All response data was normalised 100Da molecular weight for each analyte allowing direct comparison of responses. The data represents as mean values ( $\pm$ SD) of three replicates of three independent experiments ( $n = 3$ ).

| Ligand (A) | Response units (RU $\pm$ s.d) | Ligand (B)              | Response units (RU $\pm$ s.d) | Experimental RU (RU <sup>B+A</sup> $\pm$ s.d) | Experimental RU (RU <sup>A+B</sup> $\pm$ s.d) | Theoretical RU (Independent) | Theoretical RU (Shared) | Binding Status (B +A) | Binding Status (A+B) |
|------------|-------------------------------|-------------------------|-------------------------------|-----------------------------------------------|-----------------------------------------------|------------------------------|-------------------------|-----------------------|----------------------|
| arginine   | 1.09 $\pm$ 0.3                |                         |                               |                                               |                                               |                              |                         |                       |                      |
|            | +                             | fumarate                | 4.00 $\pm$ 0.4                | 2.65 $\pm$ 0.3                                | 3.51 $\pm$ 0.2                                | 5.09                         | 2.54                    | Shared                | Shared               |
|            | +                             | $\alpha$ -ketoglutarate | 1.37 $\pm$ 0.2                | 1.19 $\pm$ 0.3                                | 1.25 $\pm$ 0.1                                | 2.46                         | 1.23                    | Shared                | Shared               |
|            | +                             | malate                  | 2.16 $\pm$ 0.13               | 3.49 $\pm$ 0.5                                | 3.43 $\pm$ 0.6                                | 3.25                         | 1.62                    | Independent           | Independent          |
|            | +                             | isoleucine              | 3.30 $\pm$ 0.4                | 2.54 $\pm$ 0.3                                | 3.32 $\pm$ 0.1                                | 4.39                         | 2.19                    | Shared                | Shared               |
|            | +                             | thiamine                | 1.83 $\pm$ 0.2                | 2.91 $\pm$ 0.2                                | 1.3 $\pm$ 0.2                                 | 2.92                         | 1.46                    | Independent           | Shared               |
|            | +                             | purine                  | 3.41 $\pm$ 0.4                | 3.64 $\pm$ 0.8                                | 3.88 $\pm$ 0.3                                | 4.50                         | 2.25                    | Shared                | Shared               |
|            | +                             | aspartate               | 2.18 $\pm$ 0.4                | 2.47 $\pm$ 0.3                                | 1.50 $\pm$ 0.2                                | 3.27                         | 1.63                    | Shared                | Shared               |
|            | +                             | galactose               | 1.72 $\pm$ 0.3                | 3.95 $\pm$ 0.2                                | 2.43 $\pm$ 0.3                                | 2.81                         | 1.41                    | Independent           | Independent          |
|            | +                             | mannose                 | 1.78 $\pm$ 0.3                | 2.20 $\pm$ 0.3                                | 1.69 $\pm$ 0.3                                | 2.87                         | 1.43                    | Shared                | Shared               |
|            | +                             | rhamnos                 | 2.74                          | 1.89                                          | 1.66                                          | 3.83                         | 1.92                    | Shared                | Shared               |



|        |               |                 |               |               |               |      |       |             |             |
|--------|---------------|-----------------|---------------|---------------|---------------|------|-------|-------------|-------------|
|        |               | e               | ±0.3          | ±0.3          | ±0.2          |      |       |             |             |
|        | +             | fucose          | 2.31<br>±0.2  | 1.89<br>±0.1  | 3.37<br>±0.2  | 3.41 | 1.70  | Shared      | Shared      |
|        | +             | Sialic acid     | 0.82<br>±0.1  | 2.03<br>±0.2  | 1.13<br>±0.2  | 1.91 | 0.95  | Independent | Shared      |
| malate | 2.16<br>±0.13 |                 |               |               |               |      |       |             |             |
|        | +             | fumarate        | 3.997<br>±0.4 | 5.7<br>±0.89  | 5.4<br>±0.49  | 6.15 | 3.076 | Shared      | Shared      |
|        | +             | α-ketoglutarate | 1.35<br>±0.2  | 3.1<br>±0.22  | 3.3<br>±0.62  | 3.52 | 1.76  | Shared      | Shared      |
|        | +             | isoleucine      | 3.2<br>±0.4   | 4.2<br>±0.3   | 4.8<br>±0.53  | 5.45 | 2.72  | Shared      | Shared      |
|        | +             | thiamine        | 1.9<br>±0.2   | 2.35<br>±0.38 | 4.13<br>±0.66 | 3.98 | 1.99  | Shared      | Independent |
|        | +             | purine          | 3.4<br>±0.4   | 3.36<br>±0.38 | 4.21<br>±0.31 | 5.56 | 2.78  | Shared      | Shared      |
|        | +             | aspartate       | 2.2<br>±0.4   | 2.92<br>±0.45 | 4.01<br>±0.45 | 4.33 | 2.16  | Shared      | Shared      |
|        | +             | galactose       | 1.7<br>±0.3   | 3.2<br>±0.52  | 2.03<br>±0.16 | 3.87 | 1.93  | Shared      | Shared      |
|        | +             | mannose         | 1.7<br>±0.5   | 3.8<br>±0.43  | 3.1<br>±0.74  | 3.93 | 1.96  | Shared      | Shared      |
|        | +             | rhamnose        | 2.74<br>±0.3  | 4.05<br>±0.19 | 3.3<br>±0.23  | 4.89 | 2.44  | Shared      | Shared      |
|        | +             | fucose          | 2.3<br>±0.2   | 4.1<br>±0.46  | 3.2<br>±0.51  | 4.47 | 2.23  | Shared      | Shared      |
|        | +             | Sialic acid     | 0.8<br>±0.1   | 2.8<br>±0.32  | 1.9<br>±0.17  | 2.97 | 1.48  | Shared      | Shared      |

**Table S8. Illustration of A-B-A competition SPR analysis of Tlp10<sup>LBD</sup>Y115A.** The table shows where a cumulative response is observed when a second analyte (B) is flown across the bound protein while the first analyte (A) is present. The experimental value (value determinant) is actual response units (RU) values calculated from competition SPR data. The theoretical value (mathematical prediction) is response units (RU) values based on math theory. For each pair of ligands, binding was categorized as independent, shared, or preferential shared. All response data was normalised 100Da molecular weight for each analyte allowing direct comparison of responses. The data represents as mean values ( $\pm$ s.d) of three replicates of three independent experiments ( $n = 3$ ).

| Ligand (A) | Response units (RU $\pm$ s.d) | Ligand (B)      | Response units (RU $\pm$ s.d) | Experimental RU (RU <sup>B+A</sup> $\pm$ s.d) | Experimental RU (RU <sup>A+B</sup> $\pm$ s.d) | Theoretical RU (Independent) | Theoretical RU (Shared) | Binding Status (B+A) | Binding Status (A+B) |
|------------|-------------------------------|-----------------|-------------------------------|-----------------------------------------------|-----------------------------------------------|------------------------------|-------------------------|----------------------|----------------------|
| arginine   | 1.18 $\pm$ 0.1                |                 |                               |                                               |                                               |                              |                         |                      |                      |
| +          | fumarate                      | 2.71 $\pm$ 0.1  | 3 $\pm$ 0.1                   | 3.07 $\pm$ 0.1                                | 3.89                                          | 1.95                         | Shared                  | Shared               |                      |
| +          | $\alpha$ -ketoglutarate       | 1.81 $\pm$ 0.1  | 1.78 $\pm$ 0.1                | 1.97 $\pm$ 0.1                                | 2.99                                          | 1.5                          | Shared                  | Shared               |                      |
| +          | malate                        | 3.64 $\pm$ 0.8  | 4.25 $\pm$ 0.1                | 4.51 $\pm$ 0.1                                | 4.81                                          | 2.41                         | Shared                  | Shared               |                      |
| +          | isoleucine                    | 2.33 $\pm$ 0.1  | 2.59 $\pm$ 0.1                | 2.78 $\pm$ 0.1                                | 3.51                                          | 1.75                         | Shared                  | Shared               |                      |
| +          | thiamine                      | 3.49 $\pm$ 0.08 | 5.39 $\pm$ 0.1                | 3.12 $\pm$ 0.1                                | 4.66                                          | 2.33                         | Independent             | Preferential Shared  |                      |
| +          | purine                        | 2.37 $\pm$ 0.1  | 2.75 $\pm$ 0.1                | 3.23 $\pm$ 0.1                                | 3.55                                          | 1.77                         | Shared                  | Shared               |                      |
| +          | aspartate                     | 2.14 $\pm$ 0.1  | 2.9 $\pm$ 0.1                 | 2.96 $\pm$ 0.1                                | 3.32                                          | 1.66                         | Shared                  | Shared               |                      |
| +          | galactose                     | 1.36 $\pm$ 0.1  | 3.7 $\pm$ 0.1                 | 3.53 $\pm$ 0.1                                | 2.54                                          | 1.27                         | Independent             | Independent          |                      |
| +          | mannose                       | 1.47 $\pm$ 0.1  | 2.23 $\pm$ 0.1                | 2.46 $\pm$ 0.1                                | 2.65                                          | 1.32                         | Preferential Shared     | Preferential Shared  |                      |
| +          | rhamnose                      | 1.98 $\pm$ 0.1  | 2.93 $\pm$ 0.1                | 3.58 $\pm$ 0.2                                | 3.16                                          | 1.58                         | Preferential Shared     | Independent          |                      |

|            |              |                 |                |               |                |      |      |                     |                     |
|------------|--------------|-----------------|----------------|---------------|----------------|------|------|---------------------|---------------------|
|            | +            | fucose          | 2.59<br>±0.1   | 3.22<br>±0.1  | 4.17<br>±0.15  | 3.77 | 1.88 | Preferential Shared | Independent         |
|            | +            | Sialic acid     | 0.86<br>±0.07  | 1.76<br>±0.09 | 1.95<br>±0.05  | 2.03 | 1.02 | Preferential Shared | preferential Shared |
| mala<br>te | 3.64<br>±0.8 |                 |                |               |                |      |      |                     |                     |
|            | +            | fumarate        | 3.067<br>±0.18 | 5.23<br>±0.16 | 4.67<br>±0.16  | 6.7  | 3.3  | Shared              | Shared              |
|            | +            | α-ketoglutarate | 1.81<br>±0.14  | 3.53<br>±0.15 | 3.818<br>±0.15 | 5.44 | 2.72 | Shared              | Shared              |
|            | +            | isoleucine      | 2.24<br>±0.21  | 3.73<br>±0.15 | 3.95<br>±0.15  | 5.88 | 2.94 | Shared              | Shared              |
|            | +            | thiamine        | 2.99<br>±0.079 | 5.77<br>±0.15 | 9.8<br>±0.15   | 6.63 | 3.31 | Shared              | Independent         |
|            | +            | purine          | 2.4<br>±0.29   | 4.2<br>±0.16  | 4.91<br>±0.16  | 6.04 | 3.02 | Shared              | Shared              |
|            | +            | aspartate       | 2.14<br>±0.26  | 3.85<br>±0.15 | 3.48<br>±0.15  | 5.77 | 2.88 | Shared              | Shared              |
|            | +            | galactose       | 1.24<br>±0.19  | 2.97<br>±0.13 | 3.99<br>±0.13  | 4.88 | 2.44 | Shared              | Shared              |
|            | +            | mannose         | 1.47<br>±0.11  | 3.4<br>±0.13  | 3.97<br>±0.13  | 5.1  | 2.55 | Shared              | Shared              |
|            | +            | rhamnose        | 1.67<br>±0.21  | 3.78<br>±0.14 | 3.99<br>±0.14  | 5.31 | 2.65 | Shared              | Shared              |
|            | +            | fucose          | 2.77<br>±0.21  | 3.25<br>±0.14 | 4.45<br>±0.14  | 6.4  | 3.2  | Shared              | Shared              |
|            | +            | Sialic acid     | 0.79<br>±0.01  | 2.41<br>±0.09 | 2.37<br>±0.09  | 4.42 | 2.21 | Shared              | Shared              |

**Table S9. Illustration of A-B-A competition SPR analysis of Tlp10<sup>LBD</sup>Y120A.** The table shows where a cumulative response is observed when a second analyte (B) is flown across the bound protein while the first analyte (A) is present. The experimental value (value determinant) is actual response units (RU) values calculated from competition SPR data. The theoretical value (mathematical prediction) is response units (RU) values based on math theory. For each pair of ligands, binding was categorized as independent, shared, or preferential shared. All response data was normalised 100Da molecular weight for each analyte allowing direct comparison of responses. The data represents as mean values ( $\pm$ s.d) of three replicates of three independent experiments ( $n = 3$ ).

| Ligand (A) | Response units (RU $\pm$ s.d) | Ligand (B)      | Response units (RU $\pm$ s.d) | Experimental RU (RU <sup>B+A</sup> $\pm$ s.d) | Experimental RU (RU <sup>A+B</sup> $\pm$ s.d) | Theoretical RU (Independent) | Theoretical RU (Shared) | Binding Status (B+A) | Binding Status (A+B) |
|------------|-------------------------------|-----------------|-------------------------------|-----------------------------------------------|-----------------------------------------------|------------------------------|-------------------------|----------------------|----------------------|
| arginine   | 1.00 $\pm$ 0.06               |                 |                               |                                               |                                               |                              |                         |                      |                      |
| +          | fumarate                      | 2.63 $\pm$ 0.1  | 3.27 $\pm$ 0.1                | 3 $\pm$ 0.15                                  | 3.63                                          | 1.82                         | Shared                  | Shared               |                      |
| +          | $\alpha$ -ketoglutarate       | 1.75 $\pm$ 0.1  | 1.72 $\pm$ 0.1                | 1.97 $\pm$ 0.04                               | 2.75                                          | 1.37                         | Shared                  | Shared               |                      |
| +          | malate                        | 3.08 $\pm$ 0.08 | 3.80 $\pm$ 0.06               | 4.12 $\pm$ 0.06                               | 4.08                                          | 2.04                         | Shared                  | Independent          |                      |
| +          | isoleucine                    | 2.33 $\pm$ 0.2  | 2.59 $\pm$ 0.09               | 2.46 $\pm$ 0.1                                | 3.33                                          | 1.66                         | Shared                  | Shared               |                      |
| +          | thiamine                      | 2.96 $\pm$ 0.09 | 4.62 $\pm$ 0.07               | 2.93 $\pm$ 0.1                                | 3.96                                          | 1.98                         | Independent             | Shared               |                      |
| +          | purine                        | 2.62 $\pm$ 0.06 | 3.09 $\pm$ 0.1                | 3.23 $\pm$ 0.07                               | 3.63                                          | 1.81                         | Shared                  | Shared               |                      |
| +          | aspartate                     | 2.22 $\pm$ 0.1  | 3.16 $\pm$ 0.10               | 2.96 $\pm$ 0.05                               | 3.22                                          | 1.61                         | Shared                  | Shared               |                      |
| +          | galactose                     | 1.58 $\pm$ 0.04 | 3.53 $\pm$ 0.04               | 3.25 $\pm$ 0.06                               | 2.59                                          | 1.29                         | Independent             | Independent          |                      |
| +          | mannose                       | 1.69 $\pm$ 0.07 | 2.57 $\pm$ 0.1                | 2.23 $\pm$ 0.08                               | 2.7                                           | 1.35                         | Shared                  | Shared               |                      |
| +          | rhamnose                      | 2.28 $\pm$ 0.04 | 3.34 $\pm$ 0.1                | 2.99 $\pm$ 0.09                               | 3.29                                          | 1.64                         | Independent             | Shared               |                      |

|        |               |                 |                |                 |                |      |       |             |             |
|--------|---------------|-----------------|----------------|-----------------|----------------|------|-------|-------------|-------------|
|        | +             | fucose          | 2.53<br>±0.1   | 3.34<br>±0.09   | 3.81<br>±0.04  | 3.57 | 1.86  | Shared      | Independent |
|        | +             | Sialic acid     | 0.99<br>±0.1   | 1.96<br>±0.1    | 1.53<br>±0.09  | 1.99 | 1     | Independent | Shared      |
| malate | 3.08<br>±0.08 |                 |                |                 |                |      |       |             |             |
|        | +             | fumarate        | 2.62<br>±0.061 | 4.517<br>±0.085 | 4.03<br>±0.144 | 5.7  | 2.852 | Shared      | Shared      |
|        | +             | α-ketoglutarate | 1.74<br>±0.048 | 3.1<br>±0.133   | 3.17<br>±0.076 | 4.8  | 2.411 | Shared      | Shared      |
|        | +             | isoleucine      | 2.32<br>±0.137 | 3.05<br>±0.158  | 3.2<br>±0.140  | 5.4  | 2.701 | Shared      | Shared      |
|        | +             | thiamine        | 2.95<br>±0.040 | 3.18<br>±0.053  | 5.28<br>±0.155 | 6    | 3.017 | Shared      | Shared      |
|        | +             | purine          | 2.62<br>±0.059 | 3.89<br>±0.118  | 4.36<br>±0.056 | 5.7  | 2.849 | Shared      | Shared      |
|        | +             | aspartate       | 2.21<br>±0.173 | 3.63<br>±0.139  | 3.18<br>±0.079 | 5.3  | 2.646 | Shared      | Shared      |
|        | +             | galactose       | 1.58<br>±0.03  | 2.97<br>±0.045  | 3.34<br>±0.045 | 4.7  | 2.329 | Shared      | Shared      |
|        | +             | mannose         | 1.69<br>±0.03  | 3.02<br>±0.14   | 3.4<br>±0.095  | 4.8  | 2.385 | Shared      | Shared      |
|        | +             | rhamnose        | 2.28<br>±0.04  | 3.52<br>±0.1    | 3.58<br>±0.047 | 5.4  | 2.680 | Shared      | Shared      |
|        | +             | fucose          | 2.52<br>±0.14  | 3.118<br>±0.15  | 3.722<br>±0.1  | 5.6  | 2.802 | Shared      | Shared      |
|        | +             | Sialic acid     | 0.98<br>±0.09  | 2.18<br>±0.04   | 2.12<br>±0.24  | 4.1  | 2.031 | Shared      | Shared      |

**Table S10. Illustration of A-B-A competition SPR analysis of Tlp10<sup>LBD</sup>H193A.** The table shows where a cumulative response is observed when a second analyte (B) is flown across the bound protein while the first analyte (A) is present. The experimental value (value determinant) is actual response units (RU) values calculated from competition SPR data. The theoretical value (mathematical prediction) is response units (RU) values based on math theory. For each pair of ligands, binding was categorized as independent, shared, or preferential shared. All response data was normalised 100Da molecular weight for each analyte allowing direct comparison of responses. The data represents as mean values ( $\pm$ s.d) of three replicates of three independent experiments ( $n = 3$ ).

| Ligand (A) | Response units (RU $\pm$ s.d) | Ligand (B)              | Response units (RU $\pm$ s.d) | Experimental RU (RU <sup>B+A</sup> $\pm$ s.d) | Experimental RU (RU <sup>A+B</sup> $\pm$ s.d) | Theoretical RU<br>(Independent) | Theoretical RU<br>(Shared) | Binding Status (B+A) | Binding Status (A+B) |
|------------|-------------------------------|-------------------------|-------------------------------|-----------------------------------------------|-----------------------------------------------|---------------------------------|----------------------------|----------------------|----------------------|
| arginine   | 1.52<br>$\pm$ 0.3             |                         |                               |                                               |                                               |                                 |                            |                      |                      |
|            | +                             | fumarate                | 3.56<br>$\pm$ 0.3             | 2.55<br>$\pm$ 0.2                             | 3.41<br>$\pm$ 0.2                             | 5.08                            | 2.54                       | Shared               | Preferential Shared  |
|            | +                             | $\alpha$ -ketoglutarate | 2.02<br>$\pm$ 0.1             | 1.4<br>$\pm$ 0.16                             | 1.47<br>$\pm$ 0.1                             | 3.54                            | 1.77                       | Shared               | Shared               |
|            | +                             | malate                  | 3.26<br>$\pm$ 0.1             | 4.99<br>$\pm$ 0.2                             | 4.80<br>$\pm$ 0.2                             | 4.78                            | 2.39                       | Independent          | Independent          |
|            | +                             | isoleucine              | 3.18<br>$\pm$ 0.2             | 2.96<br>$\pm$ 0.5                             | 3.88<br>$\pm$ 0.04                            | 4.7                             | 2.35                       | Preferential Shared  | Preferential Shared  |
|            | +                             | thiamine                | 2.89<br>$\pm$ 0.1             | 4.69<br>$\pm$ 0.1                             | 2.30<br>$\pm$ 0.1                             | 4.41                            | 2.2                        | Independent          | Preferential Shared  |
|            | +                             | purine                  | 2.54<br>$\pm$ 0.2             | 3.01<br>$\pm$ 0.2                             | 3.07<br>$\pm$ 0.1                             | 4.06                            | 2.03                       | Preferential Shared  | Preferential Shared  |
|            | +                             | aspartate               | 2.29<br>$\pm$ 0.2             | 2.44<br>$\pm$ 0.2                             | 1.59<br>$\pm$ 0.2                             | 3.81                            | 1.91                       | Preferential Shared  | Shared               |
|            | +                             | galactose               | 1.80<br>$\pm$ 0.2             | 3.81<br>$\pm$ 0.2                             | 3.51<br>$\pm$ 0.3                             | 3.33                            | 1.66                       | Independent          | Independent          |
|            | +                             | mannose                 | 1.86<br>$\pm$ 0.2             | 2.23<br>$\pm$ 0.4                             | 1.78<br>$\pm$ 0.4                             | 3.38                            | 1.69                       | Preferential Shared  | Preferential Shared  |

|        |              |                 |               |                 |               |      |      |                     |                     |
|--------|--------------|-----------------|---------------|-----------------|---------------|------|------|---------------------|---------------------|
|        | +            | rhamnose        | 2.83<br>±0.20 | 1.98<br>±0.2    | 4.74<br>±0.4  | 4.35 | 2.18 | Shared              | Independent         |
|        | +            | fucose          | 2.35<br>±0.22 | 1.98<br>±0.2    | 3.99<br>±0.1  | 3.87 | 1.93 | Shared              | Independent         |
|        | +            | Sialic acid     | 0.69<br>±0.1  | 2.03<br>±0.1    | 1.19<br>±0.1  | 2.21 | 1.11 | Preferential Shared | Preferential Shared |
| malate | 3.64<br>±0.8 |                 |               |                 |               |      |      |                     |                     |
|        | +            | fumarate        | 3.56<br>±0.3  | 5.5<br>±0.85    | 5.03<br>±0.14 | 6.82 | 3.41 | Shared              | Shared              |
|        | +            | α-ketoglutarate | 2.02<br>±0.1  | 4.1<br>±0.13    | 4.6<br>±0.3   | 5.28 | 2.64 | Shared              | Shared              |
|        | +            | isoleucine      | 3.18<br>±0.4  | 5<br>±0.18      | 5.9<br>±0.14  | 6.44 | 3.22 | Shared              | Shared              |
|        | +            | thiamine        | 2.89<br>±0.5  | 3.17<br>±0.53   | 6.28<br>±0.15 | 6.14 | 3.07 | Shared              | Shared              |
|        | +            | purine          | 2.54<br>±0.21 | 3.8<br>±0.11    | 4.3<br>±0.5   | 5.79 | 2.89 | Shared              | Shared              |
|        | +            | aspartate       | 2.29<br>±0.3  | 4.6<br>±0.13    | 5.2<br>±0.79  | 5.55 | 2.77 | Shared              | Shared              |
|        | +            | galactose       | 1.80<br>±0.2  | 2.972<br>±0.4   | 3.341<br>±0.5 | 5.06 | 2.53 | Shared              | Shared              |
|        | +            | mannose         | 1.86<br>±0.2  | 3<br>±0.14      | 4.4<br>±0.9   | 5.12 | 2.56 | Shared              | Shared              |
|        | +            | rhamnose        | 2.83<br>±0.20 | 4.5<br>±0.101   | 4.8<br>±0.047 | 6.09 | 3.04 | Shared              | Shared              |
|        | +            | fucose          | 2.35<br>±0.22 | 3.118<br>±0.154 | 5.22<br>±0.1  | 5.6  | 2.8  | Shared              | Shared              |
|        | +            | Sialic acid     | 0.69<br>±0.1  | 2.18<br>±0.41   | 2.2<br>±0.24  | 3.95 | 1.97 | Shared              | Shared              |

**Table S11. Analysis of protein-protein interactions with Tlp10<sup>sig</sup> using the yeast two-hybrid system.** The following *C. jejuni* chemotaxis proteins/domains were analysed for interactions with the Tlp10 signalling domain (Tlp10<sup>sig</sup>): CheA, CheW, CheV, the CheW-like domain of CheV (CheV<sup>dW</sup>), CheY, the signalling domain of Tlp1 (Tlp1<sup>sig</sup>), the signalling domain common to Tlps 2, 3, and 4 (Tlp234<sup>sig</sup>) and the signalling domain of Tlp7 (Tlp7<sup>sig</sup>) (described in detail in Table S12).

| <b>AD-Tlp10<sup>sig</sup> with:</b> |     | <b>BD-Tlp10<sup>sig</sup> with:</b> |     |
|-------------------------------------|-----|-------------------------------------|-----|
| BD-CheA                             | -   | AD-CheA                             | -   |
| BD-CheW                             | -   | AD-CheW                             | +   |
| BD-CheV                             | +++ | AD-CheV                             | +++ |
| BD-CheV <sup>dW</sup>               | +++ | AD-CheV <sup>dW</sup>               | +++ |
| BD-CheY                             | -   | AD-CheY                             | -   |
| BD-Tlp10 <sup>sig</sup>             | ++  | AD-Tlp10 <sup>sig</sup>             | ++  |
| BD-Tlp1 <sup>sig</sup>              | +   | AD-Tlp1 <sup>sig</sup>              | +   |
| BD-Tlp234 <sup>sig</sup>            | +   | AD-Tlp234 <sup>sig</sup>            | +   |
| BD-Tlp7 <sup>sig</sup>              | +   | AD-Tlp7 <sup>sig</sup>              | -   |

\*Protein-protein interactions of Tlp10<sup>sig</sup> fused to the GAL-4 activation domain (AD- Tlp10<sup>sig</sup>) and GAL-4 binding domain (BD- Tlp10<sup>sig</sup>) were analysed with selected chemotaxis proteins and individual domains fused to the GAL-4 DNA binding domain (BD) and GAL-4 activation domain (AD), respectively. Co-transformation of AD-CheW and BD-CheA was used as a positive control when testing for interactions, with a result of +++.

+++ : cream, dense growth of > 75% of co-transformants observed on high stringency media and intermediate stringency media (strong interaction).

++ : creamy pink, moderate growth for 50% - 75% of co-transformants observed on high stringency media and intermediate stringency media (medium interaction).

+ : creamy pink, light growth for up to 50% of co-transformants observed on high stringency media and/or intermediate stringency media (weak interaction).

- : no growth of co-transformants observed.



**Table S12. Fusion proteins for yeast two-hybrid experiments.** The indicated chemotaxis proteins from *C. jejuni* NCTC11168-O were expressed as fusions to the GAL-4 activation domain (AD) and to the DNA-binding domain (BD) using pGADT7 and pGBKT7, respectively.

| <b><i>C. jejuni</i> NCTC11168 chemotaxis protein/domain</b> | <b>Description of protein/domain</b>                                                                                                                                                                                |
|-------------------------------------------------------------|---------------------------------------------------------------------------------------------------------------------------------------------------------------------------------------------------------------------|
| Tlp1 <sup>sig</sup>                                         | Residues 501 - 684 of Tlp1 (Cj1506c) encompassing the cytoplasmic signalling domain                                                                                                                                 |
| Tlp2(3, 4) <sup>sig</sup>                                   | Residues 513 – 659 of Tlp 2 (Cj0144), residues 517 – 662 of Tlp 3 (Cj1564) and residues 520 – 665 of Tlp 4 (Cj0262c) encompassing the cytoplasmic signalling domain, these residues are identical in Tlps2, 3 and 4 |
| Tlp7 <sup>sig</sup>                                         | Residues 31 – 224 of Tlp7 (Cj0951c) encompassing the cytoplasmic signalling domain                                                                                                                                  |
| Tlp10 <sup>sig</sup>                                        | Residues 377 – 592 of Tlp10 (Cj0019c) encompassing the cytoplasmic signalling domain                                                                                                                                |
| CheA                                                        | Cj0284c, the full length CheA homologue                                                                                                                                                                             |
| CheW                                                        | Cj0283c, the full length CheW homologue                                                                                                                                                                             |
| CheV                                                        | Cj0285c, the full length CheV homologue                                                                                                                                                                             |
| CheV <sup>dW</sup>                                          | Residues 1-166 of CheV (Cj0285c) encompassing the CheW-like domain                                                                                                                                                  |
| CheY                                                        | Cj1118c, the full length CheY homologue                                                                                                                                                                             |

**Table S13. Microbial strains and plasmids used in this study.**

| Strain/Plasmid                                                                 | Description                                                                                                                                                                                                                                                                                                                         | Reference/source |
|--------------------------------------------------------------------------------|-------------------------------------------------------------------------------------------------------------------------------------------------------------------------------------------------------------------------------------------------------------------------------------------------------------------------------------|------------------|
| Bacterial strains/ plasmids                                                    |                                                                                                                                                                                                                                                                                                                                     |                  |
| <i>C. jejuni</i><br>NCTC11168                                                  | Genome sequenced strain of <i>C. jejuni</i> 11168                                                                                                                                                                                                                                                                                   | 63               |
| <i>C. jejuni</i> 11168-O                                                       | Original clinical isolate of <i>C. jejuni</i> 11168                                                                                                                                                                                                                                                                                 | (Skirrow, 1977)  |
| <i>C. jejuni</i> 11168-O<br>$\Delta tlp10^{LBD}::aphA3$                        | Isogenic mutant of <i>tlp10</i>                                                                                                                                                                                                                                                                                                     | This study       |
| <i>C. jejuni</i> 11168-O<br>$\Delta tlp10^{LBD}::aphA3$<br>$\Omega cj0046::Km$ | Complemented <i>tlp10</i> mutant in <i>C. jejuni</i> 11168-O $\Delta tlp10::Km$                                                                                                                                                                                                                                                     | This study       |
| <i>C. jejuni</i><br>81116 $\Delta flaA/flaB$                                   | Isogenic mutant of <i>flaA/flaB</i>                                                                                                                                                                                                                                                                                                 | J.M. Ketley      |
| <i>E. coli</i> DH5 $\alpha$                                                    | F <sup>-</sup> , $\phi 80dlacZ\Delta M15$ , $\Delta(lacZYA-argF)U169$ , <i>deoR</i> , <i>recA1</i> , <i>endA1</i> , <i>hsdR17</i> (rK <sup>-</sup> , mK <sup>+</sup> ), <i>phoA</i> , <i>supE44</i> , $\lambda^-$ , <i>thi-1</i> , <i>gyrA96</i> , <i>relA1</i>                                                                     | 15               |
| <i>E. coli</i> BL21(DE3)                                                       | F <sup>-</sup> <i>ompT hsdS<sub>B</sub></i> (rB <sup>-</sup> mB <sup>-</sup> ) <i>gal dcm</i> (DE3)                                                                                                                                                                                                                                 | Novagen          |
| <i>E. coli</i><br>BL21(DE3)pLysS                                               | F <sup>-</sup> <i>ompT hsdS<sub>B</sub></i> (rB <sup>-</sup> mB <sup>-</sup> ) <i>gal dcm</i> (DE3) pLysS (Cm <sup>R</sup> )                                                                                                                                                                                                        | Novagen          |
| pGEM-T Easy                                                                    | Cloning vector                                                                                                                                                                                                                                                                                                                      | Promega          |
| Yeast strains                                                                  |                                                                                                                                                                                                                                                                                                                                     |                  |
| <i>S.cerevisiae</i> AH109                                                      | <i>MATa</i> , <i>trp1-901</i> , <i>leu2-3, 112</i> , <i>ura3-52</i> , <i>his3-200</i> , <i>gal4<math>\Delta</math></i> , <i>gal80<math>\Delta</math></i> , <i>LYS2::GAL1<sub>UAS</sub>-GAL1<sub>TATA</sub>-HIS3</i> , <i>GAL2<sub>UAS</sub>-GAL2<sub>TATA</sub>-ADE2</i> , <i>URA3::MEL1<sub>UAS</sub>-MEL1<sub>TATA</sub>-lacZ</i> | Clontech         |
| Cloning intermediates                                                          |                                                                                                                                                                                                                                                                                                                                     |                  |
| pGEMXScheA                                                                     | <i>cheA</i> (Cj0284) cloned into pGEM-T Easy with flanking <i>XmaI/SalI</i> restriction endonuclease recognition                                                                                                                                                                                                                    | 12               |

|                  |                                                                                                                                                                                                                                                                                       |            |
|------------------|---------------------------------------------------------------------------------------------------------------------------------------------------------------------------------------------------------------------------------------------------------------------------------------|------------|
|                  | sites, Amp <sup>R</sup>                                                                                                                                                                                                                                                               |            |
| pGEMNBcheW       | <i>cheW</i> (Cj0283c) cloned into pGEM-T Easy with flanking <i>NotI/BglIII</i> restriction endonuclease recognition sites, Amp <sup>R</sup>                                                                                                                                           | 12         |
| pGEMNBcheA       | <i>cheA</i> (Cj0284) cloned into pGEM-T Easy with flanking <i>NotI/BglIII</i> restriction endonuclease recognition sites, Amp <sup>R</sup>                                                                                                                                            | 12         |
| pGEMNBcheV       | <i>cheV</i> (Cj0285c) cloned into pGEM-T Easy with flanking <i>NotI/BamHI</i> restriction endonuclease recognition sites, Amp <sup>R</sup>                                                                                                                                            | 12         |
| pGEMEBt1p1       | DNA sequence encoding residues 501-684 of <i>T1p1</i> (Cj1506c) cloned into pGEM-T Easy with flanking <i>EcoRI/BamHI</i> restriction endonuclease recognition sites, Amp <sup>R</sup>                                                                                                 | 12         |
| pGEMEBt1p2(3, 4) | DNA sequence encoding residues 513 – 659 of <i>T1p 2</i> (Cj0144), residues 517 – 662 of <i>T1p 3</i> (Cj1564) and residues 520 – 665 of <i>T1p 4</i> (Cj0262c) cloned into pGEM-T Easy with flanking <i>EcoRI/BamHI</i> restriction endonuclease recognition sites, Amp <sup>R</sup> | 13         |
| pGEMEBt1p7       | DNA sequence encoding residues 31 – 224 of <i>T1p7</i> (Cj0951c) cloned into pGEM-T Easy with flanking <i>EcoRI/BamHI</i> restriction endonuclease recognition sites, Amp <sup>R</sup>                                                                                                | This study |
| pGEMXBt1p10      | DNA sequence encoding residues 377 – 592 of <i>T1p10</i> (Cj0019c) cloned into pGEM-T Easy with flanking <i>XmaI/BamHI</i> restriction endonuclease recognition sites, Amp <sup>R</sup>                                                                                               | This study |

|                           |                                                                                                                                                                                       |          |
|---------------------------|---------------------------------------------------------------------------------------------------------------------------------------------------------------------------------------|----------|
| pGEMNdeBcheV              | <i>cheV</i> (Cj0285c) cloned into pGEM-T Easy with flanking <i>NdeI/BamHI</i> restriction endonuclease recognition sites, Amp <sup>R</sup>                                            | 12       |
| pGEMNdeBcheW              | <i>cheW</i> (Cj0283c) cloned into pGEM-T Easy with flanking <i>NdeI/BglII</i> restriction endonuclease recognition sites, Amp <sup>R</sup>                                            | 12       |
| pGEMNBt1p1                | DNA sequence encoding residues 501-684 of <i>T1p1</i> (Cj1506c) cloned into pGEM-T Easy with flanking <i>NdeI/BamHI</i> restriction endonuclease recognition sites, Amp <sup>R</sup>  | 12       |
| pGEMBScheV                | <i>cheV</i> (Cj0285c) cloned into pGEM-T Easy with flanking <i>BamHI/SalI</i> restriction endonuclease recognition sites, Amp <sup>R</sup>                                            | 12       |
| pGEMBXcheW                | <i>cheW</i> (Cj0283c) cloned into pGEM-T Easy with flanking <i>BamHI/XhoI</i> restriction endonuclease recognition sites, Amp <sup>R</sup>                                            | 12       |
| pGEMBEt1p1                | DNA sequence encoding residues 501-684 of <i>T1p1</i> (Cj1506c) cloned into pGEM-T Easy with flanking <i>BamHI/EcoRI</i> restriction endonuclease recognition sites, Amp <sup>R</sup> | 12       |
| Yeast two-hybrid plasmids |                                                                                                                                                                                       |          |
| pGADT7                    | GAL-4 activation domain expression vector                                                                                                                                             | Clontech |
| pGBKT7                    | GAL-4 DNA binding domain expression vector                                                                                                                                            | Clontech |
| pGADT7-T                  | Allows expression of the SV40 large T-antigen as a fusion to the GAL-4 AD                                                                                                             | Clontech |

|                          |                                                                                                                                                                                                      |            |
|--------------------------|------------------------------------------------------------------------------------------------------------------------------------------------------------------------------------------------------|------------|
| pGBKT7-53                | Allows expression of the murine p53 protein as a fusion to the GAL-4 DNA-BD, used as positive control when co- transformed with pGADT7-T                                                             | Clontech   |
| pGBKT7-Lam               | Allows expression of the human lamin C protein as a fusion to the GAL-4 DNA-BD, used as a negative control when co-transformed with pGADT7-T                                                         | Clontech   |
| pADcheW                  | <i>cheW</i> cloned into pGADT7, Amp <sup>R</sup>                                                                                                                                                     | 12         |
| pADcheA                  | <i>cheA</i> cloned into pGADT7, Amp <sup>R</sup>                                                                                                                                                     | 12         |
| pADcheY                  | <i>cheY</i> cloned into pGADT7, Amp <sup>R</sup>                                                                                                                                                     | 12         |
| pADcheV                  | <i>cheV</i> cloned into pGADT7, Amp <sup>R</sup>                                                                                                                                                     | 12         |
| pADcheV <sup>dW</sup>    | DNA sequence encoding the <i>CheW</i> -like domain of <i>CheV</i> cloned into pGADT7, Amp <sup>R</sup>                                                                                               | 12         |
| pADtlp1 <sup>sig</sup>   | DNA sequence encoding residues 501-684 of <i>Tlp1</i> cloned into pGADT7, Amp <sup>R</sup>                                                                                                           | 12         |
| pADtlp234 <sup>sig</sup> | DNA sequence encoding residues 513 – 659 of <i>Tlp 2</i> (Cj0144), residues 517 – 662 of <i>Tlp 3</i> (Cj1564) and residues 520 – 665 of <i>Tlp 4</i> (Cj0262c) cloned into pGADT7, Amp <sup>R</sup> | 13         |
| pADtlp7 <sup>sig</sup>   | DNA sequence encoding residues 31 – 224 of <i>Tlp7</i> cloned into pGADT7, Amp <sup>R</sup>                                                                                                          | This study |
| pADtlp10 <sup>sig</sup>  | DNA sequence encoding residues 377 – 592 of <i>Tlp10</i> cloned into pGADT7, Amp <sup>R</sup>                                                                                                        | This study |
| pBKcheW                  | <i>cheW</i> cloned into pGBKT7, Km <sup>R</sup>                                                                                                                                                      | 12         |
| pBKcheA                  | <i>cheA</i> cloned into pGBKT7, Km <sup>R</sup>                                                                                                                                                      | 12         |

|                          |                                                                                                                                                                                                     |            |
|--------------------------|-----------------------------------------------------------------------------------------------------------------------------------------------------------------------------------------------------|------------|
| pBKcheY                  | <i>cheY</i> cloned into pGBKT7, Km <sup>R</sup>                                                                                                                                                     | 12         |
| pBKcheV                  | <i>cheV</i> cloned into pGBKT7, Km <sup>R</sup>                                                                                                                                                     | 12         |
| pBKcheV <sup>dW</sup>    | DNA sequence encoding the <i>CheW</i> -like domain of <i>CheV</i> cloned into pGBKT7, Km <sup>R</sup>                                                                                               | 12         |
| pBKt1p1 <sup>sig</sup>   | DNA sequence encoding residues 501-684 of <i>Tlp1</i> cloned into pGBKT7, Km <sup>R</sup>                                                                                                           | 12         |
| pBKt1p234 <sup>sig</sup> | DNA sequence encoding residues 513 – 659 of <i>Tlp 2</i> (Cj0144), residues 517 – 662 of <i>Tlp 3</i> (Cj1564) and residues 520 – 665 of <i>Tlp 4</i> (Cj0262c) cloned into pGBKT7, Km <sup>R</sup> | 13         |
| pBKt1p7 <sup>sig</sup>   | DNA sequence encoding residues 31 – 224 of <i>Tlp7</i> cloned into pGBKT7, Km <sup>R</sup>                                                                                                          | This study |
| pBKt1p10 <sup>sig</sup>  | DNA sequence encoding residues 377 – 592 of <i>Tlp10</i> cloned into pGBKT7, Km <sup>R</sup>                                                                                                        | This study |

Mutagenesis

|          |                                                                                  |            |
|----------|----------------------------------------------------------------------------------|------------|
| pET-19b  | His-tag expression vector                                                        | Novagen    |
| pGU0708  | <i>Tlp10</i> <sup>LBD</sup> wildtype cloned into pET-19b                         | This study |
| pGU0709  | <i>Tlp10</i> <sup>LBD</sup> Y70A                                                 | This study |
| pGU07010 | <i>Tlp10</i> <sup>LBD</sup> Y115A                                                | This study |
| pGU07011 | <i>Tlp10</i> <sup>LBD</sup> Y120A                                                | This study |
| pGU07012 | <i>Tlp10</i> <sup>LBD</sup> H193A                                                | This study |
| pGU0816  | <i>Tlp10</i> cloned into pGEM-T easy                                             | This study |
| pGU0817  | $\Delta tlp10^{LBD}::Cm^R$ cloned into pGEM-T easy                               | This study |
| pGU0818  | <i>Tlp10</i> cloned into pKpfdxA vector ( <i>pKpfdxA</i> cj0046:: <i>tlp10</i> ) | This study |
| pAV35    | Chloramphenicol resistant                                                        | 65         |
| pK46     | <i>C. jejuni</i> cj0046 pseudogene integration vector; Km <sup>R</sup>           | 13         |

**Table S14. DNA primers used in this study.**

| Primer name                 | Sequence 5'-3'                           | Restriction Site | Reference  |
|-----------------------------|------------------------------------------|------------------|------------|
| <i>Mutagenesis of tlp10</i> |                                          |                  |            |
| TLP10 <sup>LBD</sup> -F     | CATATGAACTATTCTTCATCT<br>AAAGATAATAA     | <i>NdeI</i>      | This study |
| TLP10 <sup>LBD</sup> -R     | CTCGAGTTATTTAAATAAATT<br>AGATTGTTCTATAGT | <i>XhoI</i>      | This study |
| TLP10 LBD<br>Y70A-F         | TTATCAACGCTGATCCAAGTG<br>TTCA            | -                | This study |
| TLP10 LBD<br>Y70A-R         | AACACTTGGATCAGCGTTGAT<br>AAAA            | -                | This study |
| TLP10 LBD<br>Y115A-F        | TTTAAATCCGCAGCTTCCATA<br>GCAGTA          | -                | This study |
| TLP10 LBD<br>Y115A-R        | TACTGCTATGGAAGCTGCGGA<br>TTTAAA          | -                | This study |
| TLP10 LBD<br>Y120A-F        | TCCATAGCAGTAGCTTCAAA<br>ACTTTAT          | -                | This study |
| TLP10 LBD<br>Y120A-R        | ATAAAGTTTTGAAGCTACTGC<br>TATGGA          | -                | This study |
| TLP10<br>LBDH193A-<br>F     | CTTTTTTTAAAAGCTTATAAC<br>ATGAT           | -                | This study |
| TLP10<br>LBDH193A-<br>R     | ATCATGTTATAAGCTTTTAAA<br>AAAAG           | -                | This study |
| TLP10 Mut-F                 | CCCGGGATGACAAATAAAAA<br>AAGTTCATTTTTG    | <i>SmaI</i>      | This study |
| TLP10 Mut-<br>R             | GAGCTCTTACTGAAAGCTAC<br>TTAATTTTCGG      | <i>SacI</i>      | This study |
| TLP10 inv-F                 | GAAGATCTGCGCTAATTTAGC<br>TAGCAAAGAAGC    | <i>BglII</i>     | This study |
| TLP10 inv-R                 | GAAGATCTTCAGTTGAAAGA<br>ACGCTTAACATAG    | <i>BglII</i>     | This study |
| TLP10Comp-<br>F             | AGGCGTCTCACATGACAAAT<br>AAAAAAAG         | <i>BsmBI</i>     | This study |
| TLP10Comp-<br>R             | GACCATGGTACTGAAAGCT<br>ACTTAATT          | <i>NcoI</i>      | This study |
| CAT F NW                    | GAAGATCTGATTGAAAAGTG<br>GATAGATTTATG     | <i>BglII</i>     | This study |
| CAT R NW                    | GAAGATCTATTTTTTCGATTGG<br>CGCGCCTGAGGG   | <i>BglII</i>     | This study |
| Topo Kan F                  | ATGATTGAACAAGATGGATTG<br>C               |                  | This study |
| Topo Kan R                  | TCAGAAGAAGCTCGTCAAGAA<br>GG              |                  | This study |
| pK46 Kan F                  | AATGGCTAAAATGAGAATATC                    |                  | This study |



|                             |                                         |       |                      |
|-----------------------------|-----------------------------------------|-------|----------------------|
| pK46 Kan R                  | AAACAATTCATCCAGTAAAAT                   |       | This study           |
| Sequencing                  |                                         |       |                      |
| T7                          | TAATACGACTCACTATAG                      |       | pET-19b<br>(Novagen) |
| Cj0046F                     | CACTACCCAATTGAAAATCTA<br>AG             |       | This study           |
| Cj0046R                     | GTGAGTTAATGCCATCATAAC                   |       | This study           |
| Cloning                     |                                         |       |                      |
| tlp7 <sup>sig</sup> EcoRIF  | <u>GAATTCTCAACAGTATCTCA</u><br>AAATGAAA | EcoRI | This study           |
| tlp7 <sup>sig</sup> BamHIR  | <u>GGATCCAAATTTGAAATTGG</u><br>TTAAGTCC | BamHI | This study           |
| tlp10 <sup>sl</sup> XmaIF   | <u>CCCGGGGAAAATATGCAAG</u><br>ATATGCACA | XmaII | This study           |
| tlp10 <sup>sig</sup> BamHIR | <u>GGATCCACTGAAAGCTACTT</u><br>AATTTTC  | BamHI | This study           |

**Table S15. MIRAGE glycan and small-molecule arrays for Tlp10.** Supplementary glycan microarray document based on MIRAGE guidelines DOI: 10.1093/glycob/cww118.

| Classification                           | Guidelines                                                                                                                                                                                                                                                                                                                                                                                                                                                                                                                                                                                                                                                                                                                                                                                                                                                                                                                                                                       |
|------------------------------------------|----------------------------------------------------------------------------------------------------------------------------------------------------------------------------------------------------------------------------------------------------------------------------------------------------------------------------------------------------------------------------------------------------------------------------------------------------------------------------------------------------------------------------------------------------------------------------------------------------------------------------------------------------------------------------------------------------------------------------------------------------------------------------------------------------------------------------------------------------------------------------------------------------------------------------------------------------------------------------------|
| <b>1. Sample: Glycan Binding Sample</b>  |                                                                                                                                                                                                                                                                                                                                                                                                                                                                                                                                                                                                                                                                                                                                                                                                                                                                                                                                                                                  |
| Description of Sample                    | <p><u>Sample names:</u><br/>Tlp10 protein</p> <p><u>Origin:</u> <i>Campylobacter jejuni</i> 11168; produced as a recombinant His -tagged protein in <i>E. coli</i>.</p> <p><u>Method of preparation:</u><br/>The preparation of Tlp10 is explained in the Materials and Methods section: Expression and purification of the periplasmic domain of tlp10.</p>                                                                                                                                                                                                                                                                                                                                                                                                                                                                                                                                                                                                                     |
| Sample modifications                     | Sample is a His Tagged protein containing only the periplasmic receptor domain of the full length Tlp10 transmembrane protein.                                                                                                                                                                                                                                                                                                                                                                                                                                                                                                                                                                                                                                                                                                                                                                                                                                                   |
| Assay protocol                           | <p>Please see <i>Materials and Methods: Identification of ligand binding potential of Tlp10 by glycan and small molecule arrays</i>.</p> <p>Proteins were complexed with mouse anti-his antibody, with secondary and tertiary AlexaFluor555 antibodies (rabbit anti-mouse, goat anti-rabbit) at a molar ratio of 4:2:1. The protein/antibody complex was incubated on ice for 10 mins prior to placing on the array. Arrays were performed with 1 µg of complexed protein incubated on the array for 20 min. Arrays were then washed 3 times in Array PBS (PBS + 2mM MgCl<sub>2</sub> + 2mM CaCl<sub>2</sub>) then dried by centrifugation for 3 min at 300 x g. Scanning was performed using ProScanArray and analyzed using ScanArray Express. Yes/no binding was determined by six positive replicate spots in three replicate experiments. Positive binding was determined by spots being significantly greater than negative control spots by two-tailed <i>t</i> test.</p> |
| <b>2.1 Glycan Library</b>                |                                                                                                                                                                                                                                                                                                                                                                                                                                                                                                                                                                                                                                                                                                                                                                                                                                                                                                                                                                                  |
| Glycan description for defined glycans   | Glycans in this study are listed in Table S2 and is a published library in doi: 10.1371/journal.pntd.0004120.                                                                                                                                                                                                                                                                                                                                                                                                                                                                                                                                                                                                                                                                                                                                                                                                                                                                    |
| Glycan description for undefined glycans | N/A.                                                                                                                                                                                                                                                                                                                                                                                                                                                                                                                                                                                                                                                                                                                                                                                                                                                                                                                                                                             |
| Glycan modifications                     | <p>Glycans were prepared in one of two ways for printing:</p> <ol style="list-style-type: none"> <li>Glycans (with IDs in number/letter format; e.g. 1A, 4C, 7K) were sourced commercially from Dextra Laboratories, Elicityl and Carbosynth and were made into glycoamines using the protocol published in Day et al 2009 (doi: 10.1371/journal.pone.0004927).</li> <li>Glycans (with IDs in number only format) were obtained from Prof Nicolai Bovin and were modified with spacers as per DOI: 10.1073/pnas.0407902101. The library of these glycans was first published in DOI: 10.1016/j.molimm.2009.06.010</li> </ol>                                                                                                                                                                                                                                                                                                                                                     |

| <b>2.2 Small molecule Library</b>                  |                                                                                                                                                                                                                                                                                                                                                                                                                                                                                                                                                                                                                                                                                                                                                |
|----------------------------------------------------|------------------------------------------------------------------------------------------------------------------------------------------------------------------------------------------------------------------------------------------------------------------------------------------------------------------------------------------------------------------------------------------------------------------------------------------------------------------------------------------------------------------------------------------------------------------------------------------------------------------------------------------------------------------------------------------------------------------------------------------------|
| Sample description for defined compounds           | Compounds printed in the amino acid/small molecule array for this study are listed in Table S3.                                                                                                                                                                                                                                                                                                                                                                                                                                                                                                                                                                                                                                                |
| <b>3. Printing Surface; e.g., Microarray Slide</b> |                                                                                                                                                                                                                                                                                                                                                                                                                                                                                                                                                                                                                                                                                                                                                |
| Description of surface                             | Epoxy activated glass microarray slides.                                                                                                                                                                                                                                                                                                                                                                                                                                                                                                                                                                                                                                                                                                       |
| Manufacturer                                       | ArrayIt SuperEpoxy 3 (SME3).                                                                                                                                                                                                                                                                                                                                                                                                                                                                                                                                                                                                                                                                                                                   |
| Custom preparation of surface                      | N/A.                                                                                                                                                                                                                                                                                                                                                                                                                                                                                                                                                                                                                                                                                                                                           |
| Non-covalent Immobilisation                        | N/A.                                                                                                                                                                                                                                                                                                                                                                                                                                                                                                                                                                                                                                                                                                                                           |
| <b>4. Arrayer (Printer)</b>                        |                                                                                                                                                                                                                                                                                                                                                                                                                                                                                                                                                                                                                                                                                                                                                |
| Description of Arrayer                             | <b>Glycan array:</b> SpotBot® Extreme Protein Microarray Spotter (ArrayIt, California, USA).<br><b>Small molecule array:</b> ArrayJet Argus Marathon non-contact printer.                                                                                                                                                                                                                                                                                                                                                                                                                                                                                                                                                                      |
| Dispensing mechanism                               | <b>Glycan array:</b> Contact printing using 946NS6 pins with a 6 pin in a 3 columns x 2 rows configuration.<br><b>Small molecule array:</b> Non-contact jet printing                                                                                                                                                                                                                                                                                                                                                                                                                                                                                                                                                                           |
| Glycan and small molecule deposition               | <b>Glycan array:</b> Approximately 1.8 nl per spot is printed according to manufactures guidelines.<br>Glycan were at 500 µM in 50:50 DMF:DMSO.<br><b>Small molecule array:</b> Approximately 320 nl per spot is printed according to manufactures guidelines.<br>Samples were at 1000 µM in PBS with 2% glycerol                                                                                                                                                                                                                                                                                                                                                                                                                              |
| Printing conditions                                | <b>Glycan array:</b> Array were printed with dehumidification at a maximum humidity of 60% relative humidity (Standard laboratory starting humidity of 75-90%) at 22°C. Glycans were left to react with the slide for at least 8 hours after the print was completed.<br><b>Small molecule array:</b> Array were printed with dehumidification at a maximum humidity of 60% relative humidity (Standard laboratory starting humidity of 75-90%) at 22°C. Samples were left to react with the slide for at least 15 hours after the print was completed.                                                                                                                                                                                        |
| <b>5.1 Glycan array with “Map”</b>                 |                                                                                                                                                                                                                                                                                                                                                                                                                                                                                                                                                                                                                                                                                                                                                |
| Array layout                                       | The array consists of a single array of glycans split between 6 pins (3 columns x 2 rows) with 4500µm row and column spacing. Each pin printed a 20 columns x 16 rows with 200µm spot spacing (centre to centre) with a minimum spot size of 100µm. Each sample is printed in quadruplicate with each of the 6 print areas including at least three negative control samples (print solution only) and two positive control samples consisting of one sample of fluoroscienamine and one sample of a mixture of rabbit anti-mouse antibody labeled with Alexa 555 and Alexa 647. Positive controls provide proof of successful immobilization of the amine reagents and provides for orientation for analysis. The antibodies also can provide |

|                                                              |                                                                                                                                                                                                                                                                                                                                                                                                                                                                                                                                                                                                                                                                                                                                                                                                                                                                                                                               |
|--------------------------------------------------------------|-------------------------------------------------------------------------------------------------------------------------------------------------------------------------------------------------------------------------------------------------------------------------------------------------------------------------------------------------------------------------------------------------------------------------------------------------------------------------------------------------------------------------------------------------------------------------------------------------------------------------------------------------------------------------------------------------------------------------------------------------------------------------------------------------------------------------------------------------------------------------------------------------------------------------------|
|                                                              | controls for secondary antibodies used in experiments (if applicable).                                                                                                                                                                                                                                                                                                                                                                                                                                                                                                                                                                                                                                                                                                                                                                                                                                                        |
| Glycan identification and quality control                    | Arrays are quality controlled by a range of measures. 1. Each printed array is post print scanned to confirm deposition of the glycans on the array surface prior to neutralization of the remaining slide surface. 2. Post neutralized slides are scanned again to monitor for remaining autofluorescence. 3. Slides are assayed with fluorescently labeled lectins: WGA-Texas Red (EY Laboratories) and ConA-FITC (EY Laboratories).                                                                                                                                                                                                                                                                                                                                                                                                                                                                                        |
| <b>5.2 Small molecule array with “Map”</b>                   |                                                                                                                                                                                                                                                                                                                                                                                                                                                                                                                                                                                                                                                                                                                                                                                                                                                                                                                               |
| Array layout                                                 | The array consists of triplicate sub-arrays of amino acids and small molecules (24 rows x 10 columns) with 400µm spot spacing (centre to centre) with a minimum spot size of 100µm. Each sample is printed six times, with each of the 3 sub-arrays including at least six negative control samples (print solution only) and a positive control samples consisting of one a mixture of rabbit anti-mouse antibody labeled with Alexa 555 and Alexa 647. Positive controls provide proof of successful immobilization of the amine reagents and provides for orientation for analysis.                                                                                                                                                                                                                                                                                                                                        |
| Sample identification and quality control                    | Arrays are quality controlled by a range of measures. 1. Each printed array is post print scanned to confirm deposition of the samples on the array surface prior to neutralization of the remaining slide surface. 2. Post neutralized slides are scanned again to monitor for remaining autofluorescence.                                                                                                                                                                                                                                                                                                                                                                                                                                                                                                                                                                                                                   |
| <b>6. Detector and Data Processing</b>                       |                                                                                                                                                                                                                                                                                                                                                                                                                                                                                                                                                                                                                                                                                                                                                                                                                                                                                                                               |
| Scanning hardware                                            | ProScanArray (Lasers: 488 nM, 532 nM with two filter sets for analysis at 532 and 595 nM), 635 nM) scanner.                                                                                                                                                                                                                                                                                                                                                                                                                                                                                                                                                                                                                                                                                                                                                                                                                   |
| Scanner settings                                             | Scanning resolution: 10µM<br>Laser channel: 532nM operating 595nM excitation / 625nM emission filter set.<br>PMT: 20% gain<br>Scan powers: Low laser power.                                                                                                                                                                                                                                                                                                                                                                                                                                                                                                                                                                                                                                                                                                                                                                   |
| Image analysis software                                      | ScanArray Express.                                                                                                                                                                                                                                                                                                                                                                                                                                                                                                                                                                                                                                                                                                                                                                                                                                                                                                            |
| Data processing                                              | Data was exported as a CSV file and exported to Microsoft Excel.                                                                                                                                                                                                                                                                                                                                                                                                                                                                                                                                                                                                                                                                                                                                                                                                                                                              |
| <b>7. Glycan Microarray Data Presentation</b>                |                                                                                                                                                                                                                                                                                                                                                                                                                                                                                                                                                                                                                                                                                                                                                                                                                                                                                                                               |
| Data presentation                                            | Glycan array: Data is presented as yes/no binding in Table S4. The full list of glycans is shown in Table S2.                                                                                                                                                                                                                                                                                                                                                                                                                                                                                                                                                                                                                                                                                                                                                                                                                 |
| <b>8. Interpretation and Conclusion from Microarray Data</b> |                                                                                                                                                                                                                                                                                                                                                                                                                                                                                                                                                                                                                                                                                                                                                                                                                                                                                                                               |
| Data interpretation                                          | <b>Glycan arrays:</b> We only use glycan arrays as a yes/no binding tool. Due to this we look only at binding that is unambiguously above background vs lack of binding above background. Average background + 3x standard deviation of the background of 20 sets of 4 spots of DMF:DMSO only spots is applied to determine if binding observed is significantly above background. Only spots with values equal to or greater than this value were considered as binding from data of any tested slide. These values are slide dependent.<br><b>Small molecule arrays:</b> We only use amino acid arrays as a yes/no binding tool. Due to this we look only at binding that is unambiguously above background vs lack of binding above background. Average background + 3x standard deviation of the background of 6 spots of PBS + 2% glycerol only spots is applied to determine if binding observed is significantly above |

|             |                                                                                                                                                                    |
|-------------|--------------------------------------------------------------------------------------------------------------------------------------------------------------------|
|             | background. Only spots with values equal to or greater than this value were considered as binding from data of any tested slide. These values are slide dependent. |
| Conclusions | Tlp10 was found to bind to a wide range of molecules on both array types indicating a broad ligand specificity for chemotaxis.                                     |

**Movie S1. *C. jejuni* migrate toward the attractant isoleucine.** Live imaging of fluorescently labelled *C. jejuni* 11168-O WT and  $\Delta tlp10$  migrating from the left chamber towards 10mM isoleucine in the right chamber in a  $\mu$ -Slide Chemotaxis apparatus.

**Movie S2. Migration of *C. jejuni* toward the attractant isoleucine is reduced by addition of the repellent arginine.** Live imaging of fluorescently labelled *C. jejuni* 11168-O WT and  $\Delta tlp10$  migrating from the left chamber of a  $\mu$ -Slide apparatus towards 10mM isoleucine in the right chamber followed by the introduction of 10 mM arginine into right chamber at the 20s time point.

**Movie S3. PBS control for the effect of arginine on the migration of WT *C. jejuni* toward isoleucine.** Live imaging of fluorescently labelled *C. jejuni* 11168-O WT from the left chamber of  $\mu$ -Slide followed by introduction of PBS into the right chamber.

**Data File S1. Proteins included in DAHL domain MSA.** List of DAHL domain-containing proteins, their domain architectures and taxonomic distribution. This is provided as an Excel file.
